# Supplementary material for: GPI-anchored FGF directs cytoneme-mediated bidirectional contacts to regulate its tissue-specific dispersion
Source: PubMed Central journal article supplement (PMC9203819; doi:10.1038/s41467-022-30417-1), 2022-06-16
Supplement: 41467_2022_30417_MOESM1_ESM.pdf [file 41467_2022_30417_MOESM1_ESM.pdf]

**GPI-anchored FGF directs cytoneme-mediated bidirectional contacts to regulate its tissue-specific dispersion.**

Lijuan Du, Alex Sohr, Yujia Li, Sougata Roy\*

**Contents**

- 1. Supplementary Figures with Figure Legends (Suppl. Fig.1-Suppl. Fig.7)**
- 2. Supplementary Tables 1-4.**
- 3. Supplementary Notes:**
  - A. Expression analyses of *bnl* splice variants**
  - B. Bioinformatic analyses of physico-chemical properties of various constructs**
  - C. Comparison of *bnl-gal4*-driven expression of transgenic constructs**
  - D. Examples of gating strategy for FACS analyses**
- 4. Supplementary References**
- 5. R plot code**

# Supplementary Figure 1

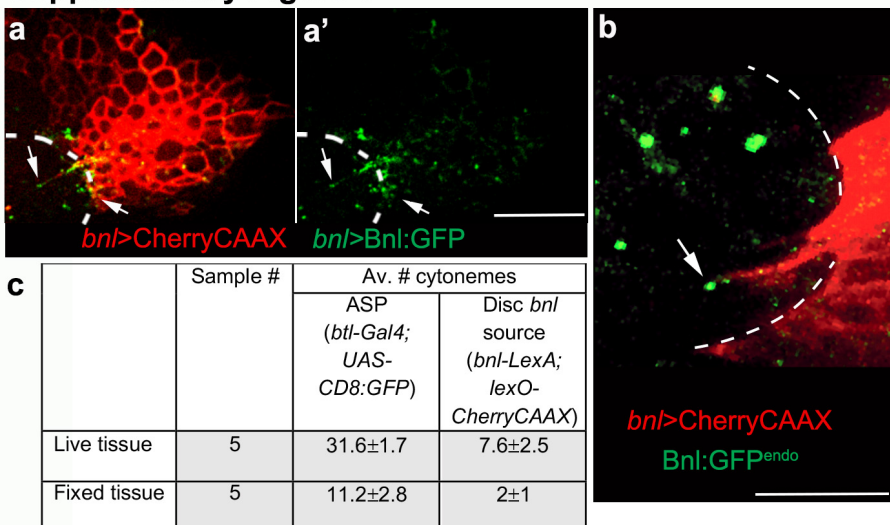

| d       | # of clones | # of cells in clones | # of cytonemes | # of cytonemes/cell |
|---------|-------------|----------------------|----------------|---------------------|
| 1       | 1           | 1                    | 2              | 2                   |
| 2       | 1           | 1                    | 2              | 2                   |
| 3       | 5           | 5                    | 19             | 3.8                 |
| 4       | 2           | 2                    | 7              | 3.5                 |
| 5       | 1           | 1                    | 5              | 5                   |
| 6       | 1           | 1                    | 5              | 5                   |
| 7       | 2           | 2                    | 6              | 3                   |
| 8       | 8           | 8                    | 20             | 2.5                 |
| 9       | 2           | 2                    | 16             | 8                   |
| 10      | 2           | 2                    | 2              | 1                   |
| 11      | 2           | 2                    | 7              | 3.5                 |
| 12      | 2           | 2                    | 5              | 2.5                 |
| 13      | 1           | 1                    | 8              | 8                   |
| Average | 2.3         | 2.3                  | 8              | 3.8                 |

*btl>CD8:GFP* *bnl>CherryCAAX*

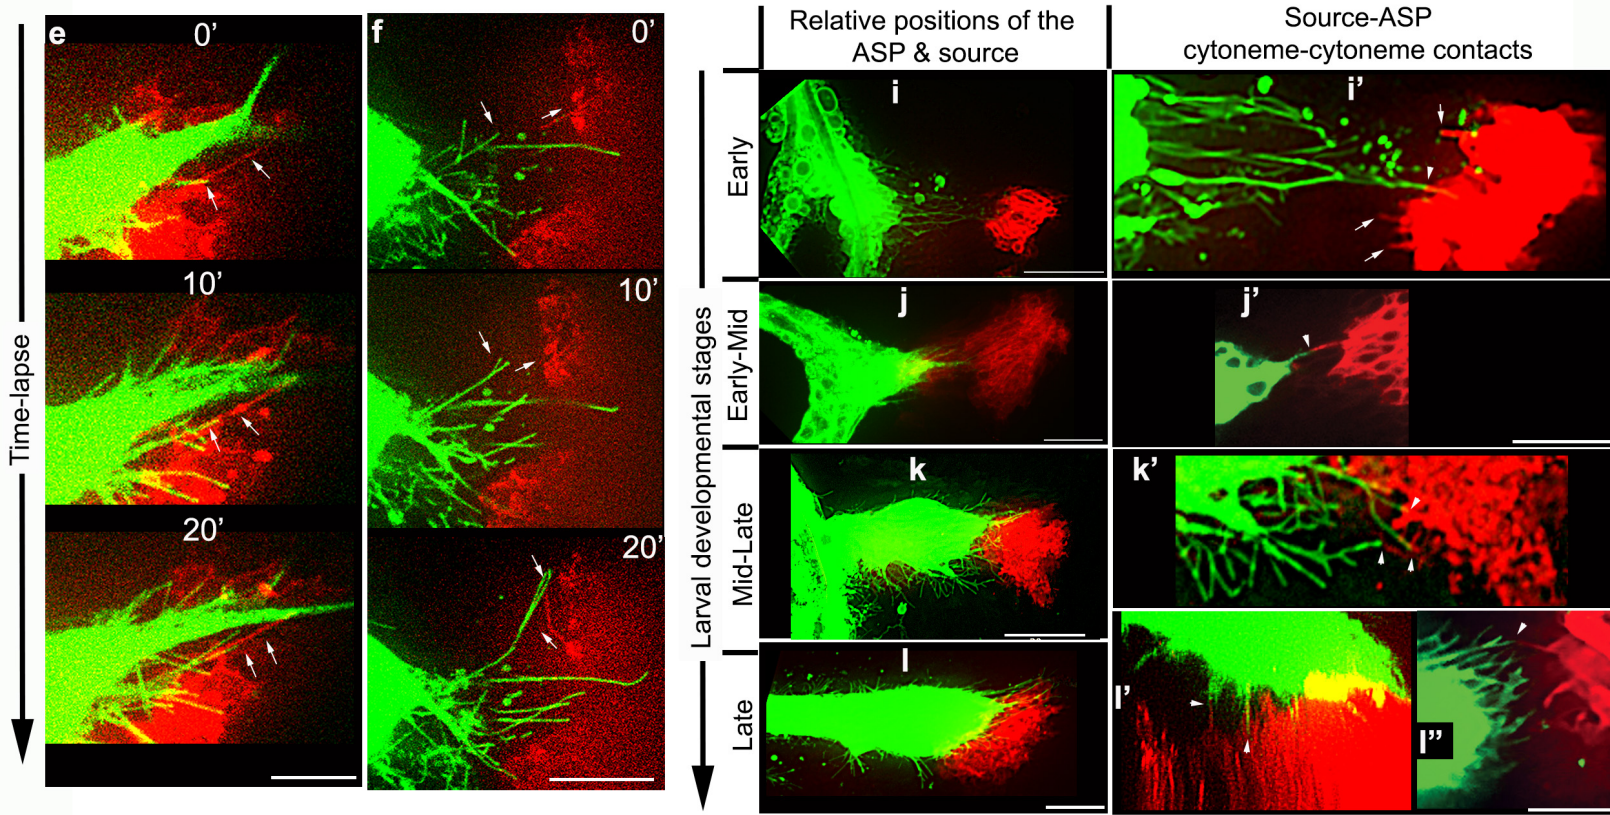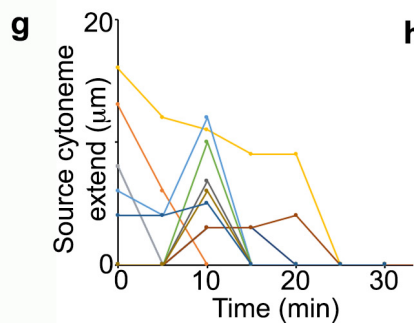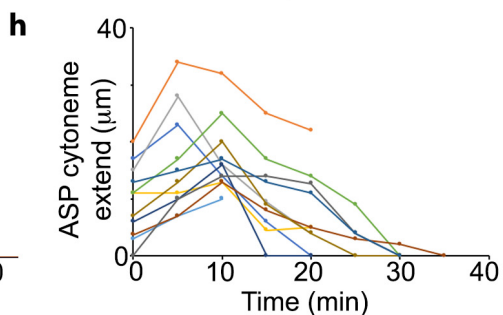

**Supplementary Figure 1. Bnl sending and receiving cytonemes reciprocally guide each other.**

**a-b** Live images of mCherryCAAX-marked wing disc *bnl* source (red) expressing either Bnl:GFP by *bnl-Gal4* (a,a'; *UAS-mCherryCAAX; bnl-Gal4 X UAS-Bnl:GFP*) or endogenous Bnl:GFP<sup>endo</sup> (b; *bnl:gfp<sup>endo</sup>/bnl>mCherryCAAX*; spinning disc confocal), showing ASP (dashed line)-specific polarity of Bnl:GFP presentation through cytonemes (arrows). **c** A comparison of cytoneme numbers (average  $\pm$  S.D.) from the ASP and wing disc source under live and fixed imaging conditions, showing that the source cytonemes are detected mostly in live imaging. **d** Table showing the number of source cytonemes emanating from CD8:GFP-marked clones within the *bnl*-source (see Methods and Fig. 1h-h"). **e-h** Time-lapse images, showing repeated cycles of extension and retraction of source (red) and recipient (green) cytonemes for reciprocal contacts; g,h, Line plots showing interacting source and recipient cytoneme dynamics (also see Supplementary Table 1); the same color in g and h represents a pair of interacting source and ASP cytonemes. **i-l**" Maintenance of a convergently polarized cytoneme-forming niche at the ASP:source interface throughout the larval development. **e-l**" genotype - *btl-Gal4,UAS-CD8:GFP/+; bnl-LexA,lexO-mCherryCAAX/+*. Scale bars, 20  $\mu$ m. Source data are provided as a Source Data file.

# Supplementary Figure 2

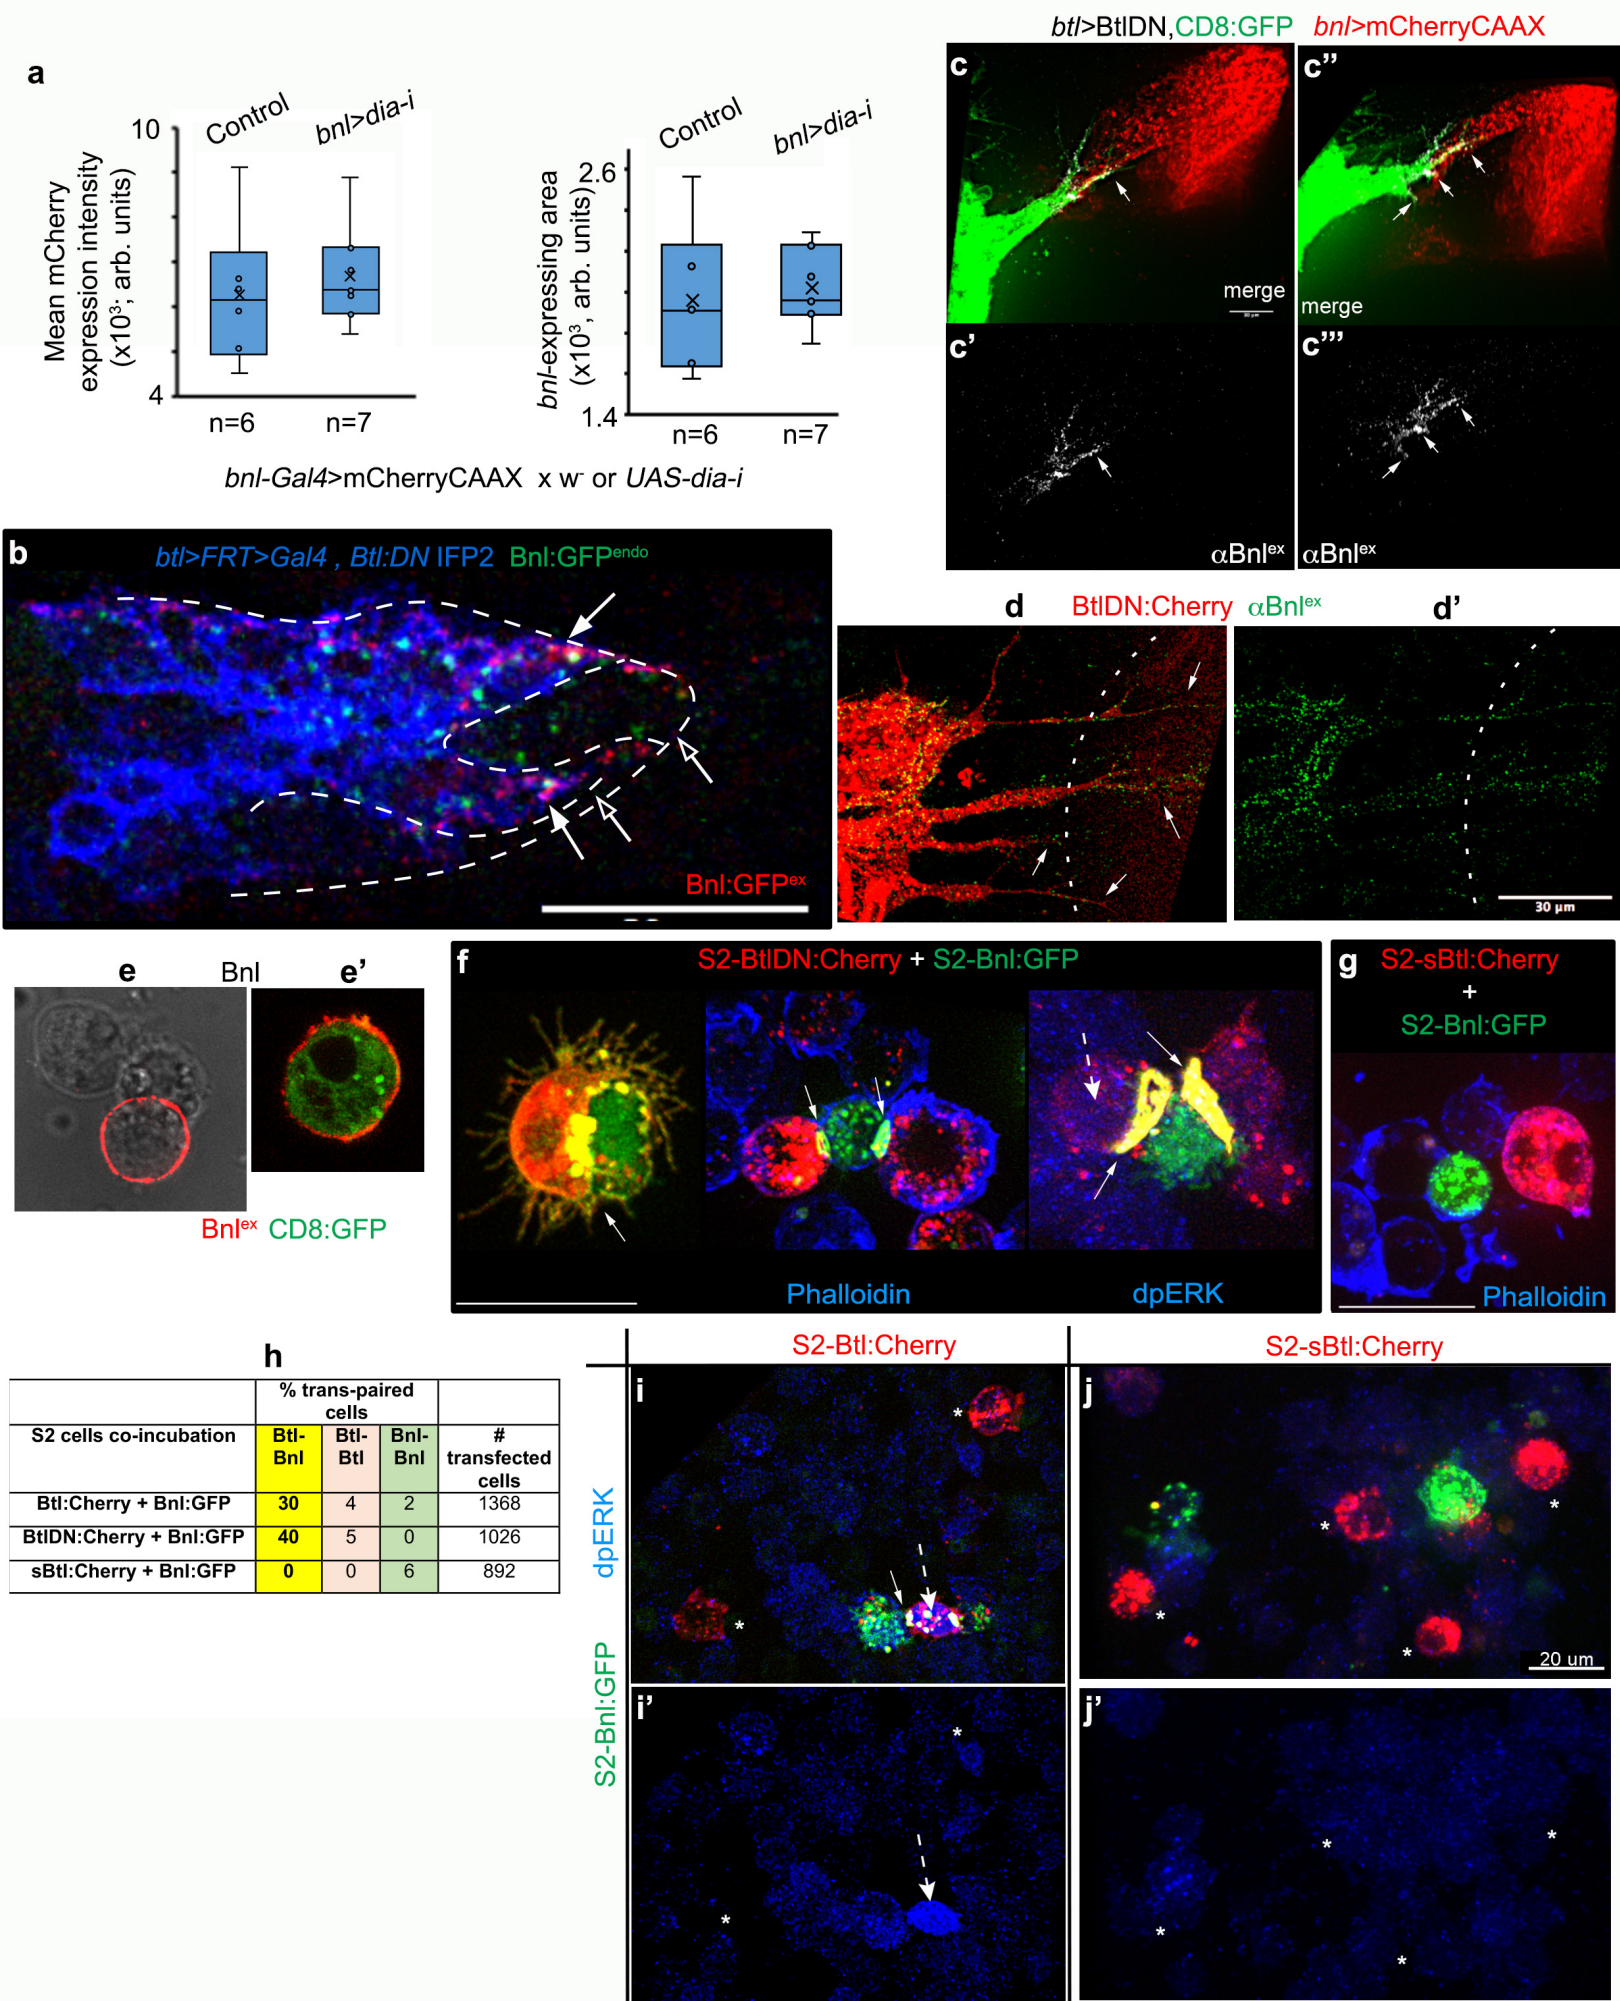

## Supplementary Figure 2. CAM-like Btl-Bnl binding mediates reciprocal contact formation.

**a** *dia-i* expression under the *bnl-Gal4* control did not change *bnl* expression area or levels as detected by the mCherryCAAX expression (*bnl-Gal4, UAS-mCherryCAAX x UAS-dia-i* (for control, *w-* was crossed to *bnl-Gal4, UAS-mCherryCAAX*); in box plots, box shows the median as well as 1<sup>st</sup> quartile and 3<sup>rd</sup> quartile, and whiskers are minimum and maximum; n - biologically independent sample number; p values - unpaired two-tailed t-test; p=0.59 for mean mCherry expression intensity and p=0.72 for *bnl*-expressing area. **b** A mosaic ASP with Btl:DN-expressing IFP2-marked clones in the *bnl:GFP<sup>endo</sup>* knock-in background (see Methods); Btl:DN-expressing surface areas on the ASP showed increased Bnl:GFP<sup>endo</sup> reception from the wing disc (arrow; probed by  $\alpha$ GFP<sup>ex</sup>) compared to the WT areas (unmarked) of the same ASP tip (open arrow). **c-c'** Bnl<sup>ex</sup> (grey,  $\alpha$ Bnl<sup>ex</sup>) is asymmetrically enriched (arrow) at the contact sites between source and Btl:DN-expressing ASP projections or cytonemes; c"/c'", 3D projection of c/c'. **d,d'** Btl-DN:Cherry-containing cytonemes (arrow) emanating from a rudimentary ASP localized Bnl<sup>ex</sup> (green,  $\alpha$ Bnl<sup>ex</sup>) puncta on their surfaces; dashed line, source area. **e,e'**  $\alpha$ Bnl<sup>ex</sup>-stained S2 cells expressing either Bnl (e) or Bnl and CD8:GFP (e'; *act-Gal4, UAS-Bnl, UAS-CD8:GFP*), showing surface localized Bnl<sup>ex</sup>, exclusively on the producing cell. **f** Different trans-paired forms of S2-Bnl:GFP and S2-Btl:DN:Cherry; arrow, trans-synaptic receptor-ligand co-clusters; dashed arrow, absence of nuclear dpERK in trans-paired S2-Btl:DN:Cherry. **g** Absence of trans-pairing between S2-sBtl:Cherry and S2-Bnl:GFP. **h** Relatively high frequency of heterotypic Btl-Bnl trans-pairing in comparison to homotypic Btl-Btl or Bnl-Bnl trans-pairing in S2-Btl:Cherry variants/S2-Bnl:GFP co-incubation assays. **i-j'** Representative examples of  $\alpha$ dpERK-stained (blue) image frames, comparing trans-pairing experiments between S2-Bnl:GFP/S2-Btl:Cherry (i,i') and S2-Bnl:GFP/S2-sBtl:Cherry (j,j'); arrow, trans-synaptic Btl-Bnl co-cluster; dashed arrow, nucleus in trans-adhered Btl-expressing cells; \*, receptor-expressing cells lacking dpERK. Scale bars, 20  $\mu$ m, 30  $\mu$ m (b,d,d'). Source data are provided as a Source Data file.

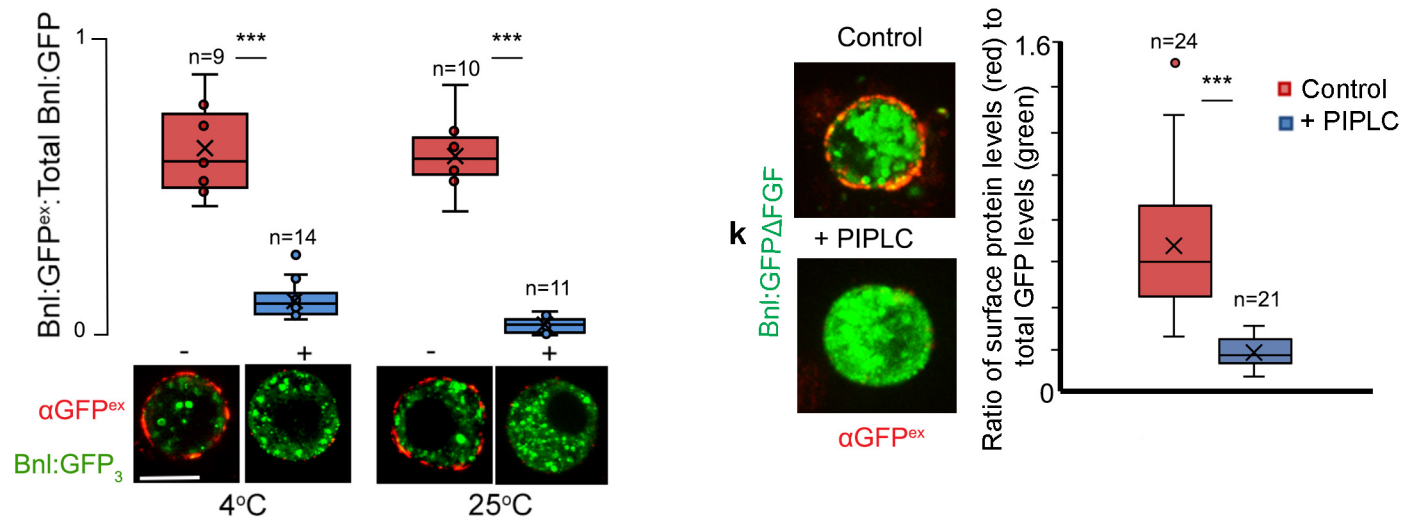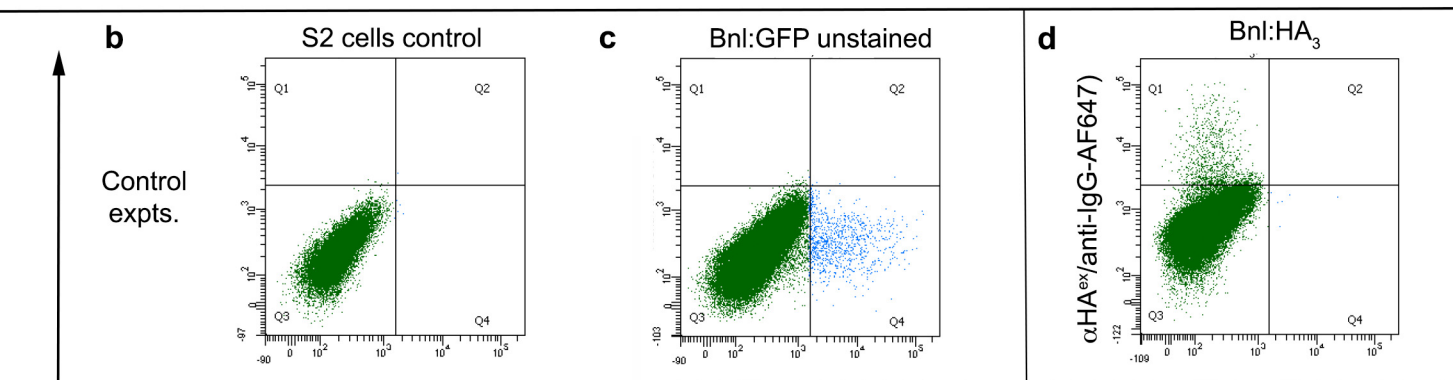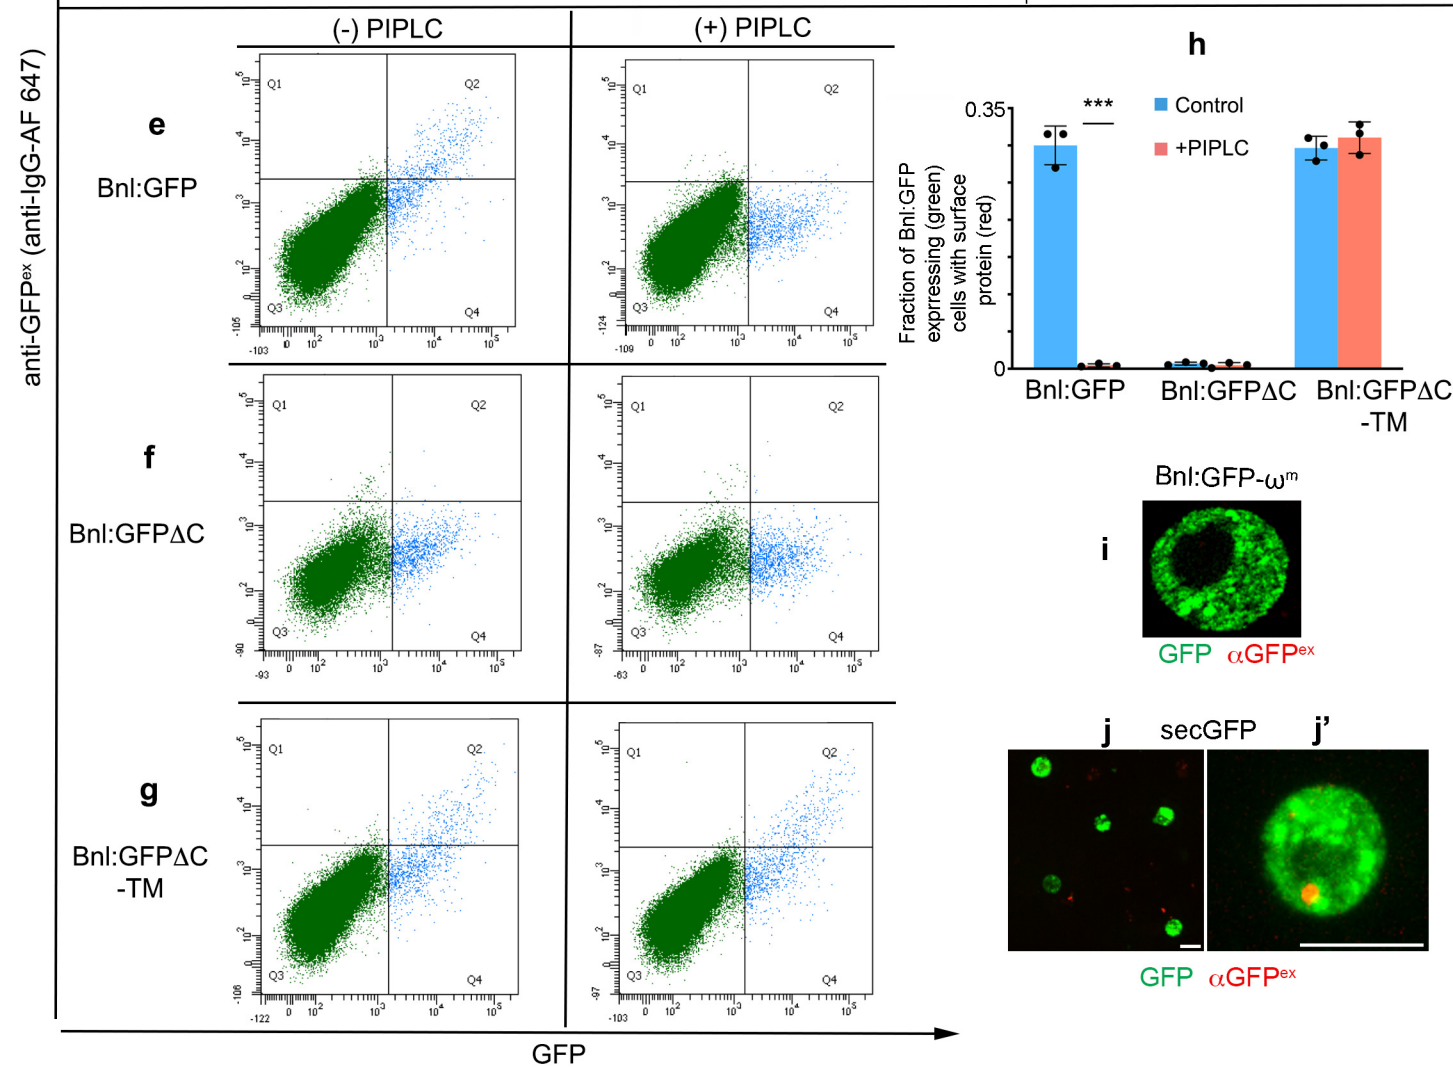

### Supplementary Figure 3. A GPI anchor tethers Bnl to the source cell surface.

**a-h** S2 cells co-transfected with *actin-Gal4* and *UAS-X*; (X = Bnl:HA<sub>3</sub>, Bnl:GFP<sub>3</sub>, BnlHA<sub>1</sub>:GFP<sub>3</sub> (Bnl:GFP), Bnl:HA<sub>1</sub>:GFP<sub>3</sub>ΔC (Bnl:GFPΔC), or Bnl:HA<sub>1</sub>:GFP<sub>3</sub>ΔC-TM (Bnl:GFPΔC-TM) as indicated; cells were surface immune-stained either with HA or GFP antibodies as indicated. **a**, Box plots depicting the ratio of surface localized Bnl:GFP<sub>3</sub> (red, αGFP<sup>ex</sup> immunostaining) to total Bnl:GFP<sub>3</sub> (green) in S2 cells before (-) after (+) the PIPLC treatment at various temperatures; lower panels, representative images of S2 cells as indicated; box shows the median as well as 1<sup>st</sup> quartile and 3<sup>rd</sup> quartile, and whiskers are minimum and maximum; n represents # cells examined; p values were calculated using unpaired two-tailed t-test; \*\*\*, p<0.001. **b-g** Representative flow cytometry profiles of S2 cells (b, control) or S2 cells expressing various constructs as indicated; b,c,d, FACS control; d, surface αHA<sup>ex</sup> staining for Bnl:HA<sub>3</sub> as a control profile for GFP-positive cells. **h** Bar graphs comparing mean values (± SD) obtained by flow cytometry analyses of cells from three independent transfection experiments similar to e, f, g; \*\*\*, p<0.001 (unpaired two-tailed t-test); total number of GFP+ cells: 3670 (Bnl:GFP, control), 3095 (Bnl:GFP, +PIPLC), 3240 (Bnl:GFPΔC, control), 3044 (Bnl:GFPΔC, +PIPLC), 3000 (Bnl:GFPΔC-TM, control), 3000 (Bnl:GFPΔC-TM, +PIPLC). **i** Lack of surface-localized protein (red, probed with αGFP<sup>ex</sup>) of Bnl:GFP-ω<sup>m</sup> expressed in S2 cells. **j,j'** αGFP<sup>ex</sup> immunostained S2 cells expressing secGFP construct showing the lack of surface distribution of the proteins due to its immediate secretion<sup>1</sup>. This is a control for bGFP-GPI, which is the same secGFP with Bnl's C-terminal signal sequence, leading to its GPI-anchoring to the producing cell surface (see Figure 4d'-f). **k** αGFP<sup>ex</sup> immunostained S2 cells (left panels) expressing Bnl:GFPΔFGF construct showing PIPLC-sensitive surface distribution of the protein; right panel, box plots comparing the fraction of expressed protein on cell surface with and without PIPLC treatment; box shows the median as well as 1<sup>st</sup> quartile and 3<sup>rd</sup> quartile, and whiskers are minimum and maximum; n = number of cells as indicated; \*\*\*, p<0.001; p values were calculated using unpaired two-tailed t-test. Scale bars, 10 μm. Source data are provided as a Source Data file.

## Supplementary Figure 4

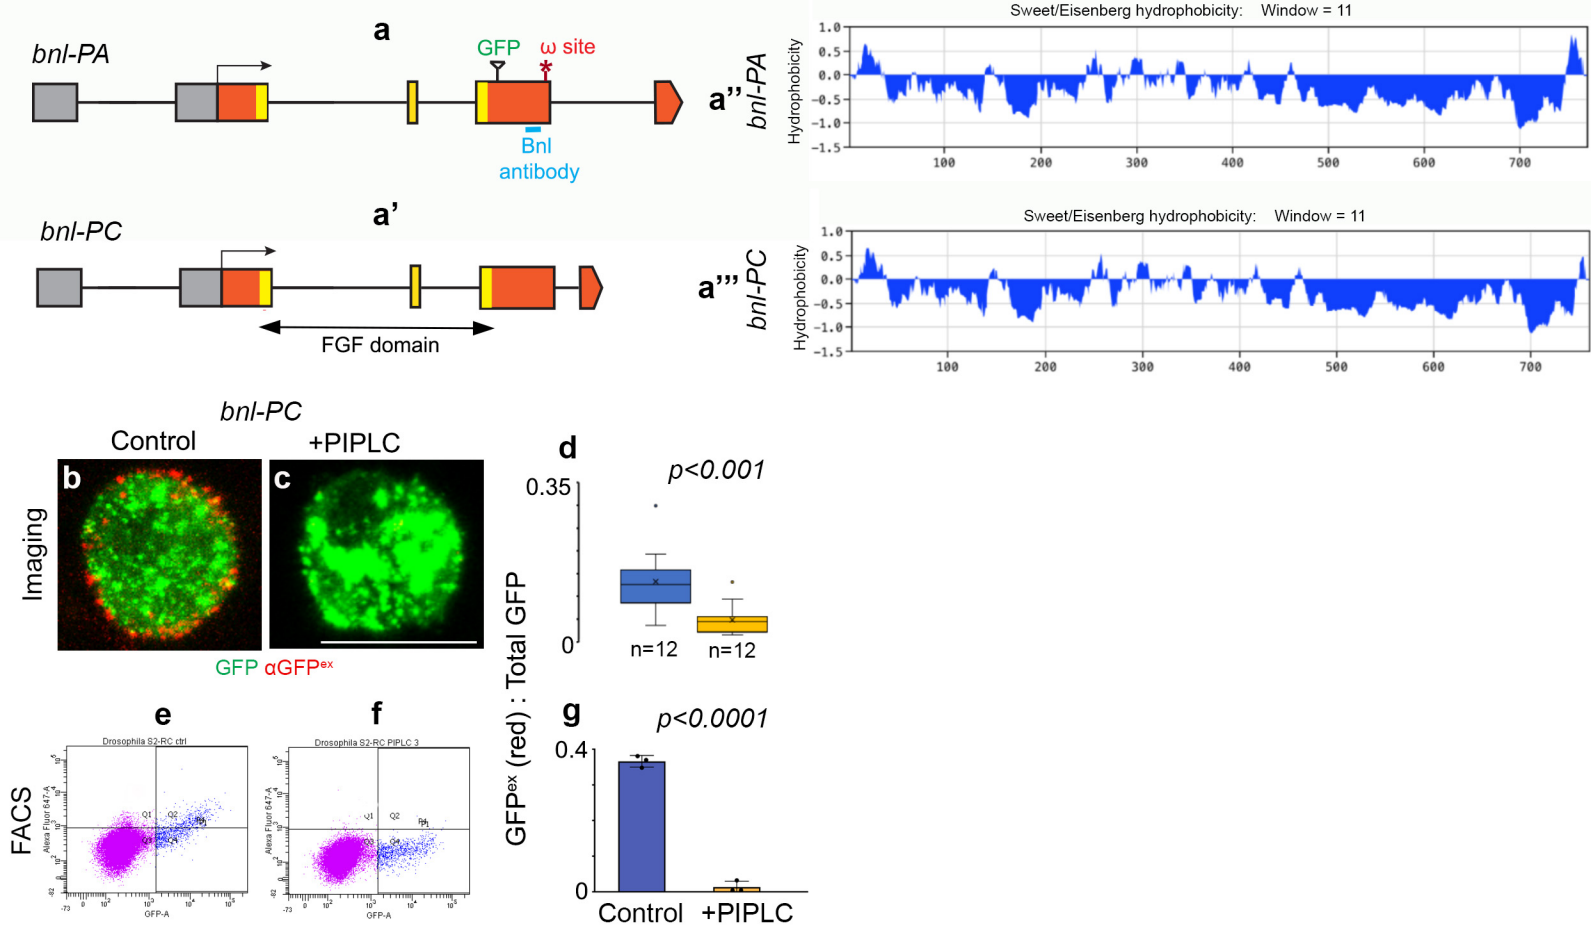



#### Supplementary Figure 4. Characterization of GPI-anchored Bnl-PC isoform.

**a-a'''** Comparison of PA and PC splice variants of *bnl*: **a,a'** Schematic maps of PA and PC loci highlighting identical FGF signaling domain, Bnl antibody binding site used for probing Bnl<sup>ex</sup>, GFP tag (for probing Bnl:GFP<sup>endo</sup>), putative  $\omega$ -site; Grey box, non-coding exons, colored box, coding exons. However, due to the alternative splicing of the last coding exons, *bnl-PC* isoform is 11 amino acid shorter at its C-terminal end than the *bnl-PA*. Subsequent to the common sequence between PA and PC, PC isoform has only 7 amino acids at its C-terminus, which is replaced by 18 amino acids sequences in PA. **a'',a'''** Comparative hydrophobicity plots of PA and PC variants showing a reduced hydrophobic stretch of C-terminal region of PC. **b-g** Extracellular  $\alpha$ GFP<sup>ex</sup>-immunostaining of S2 cells expressing Bnl:GFP<sub>3</sub>-PC showed surface-localized Bnl:GFP<sub>3</sub>-PC<sup>ex</sup> (red), which is removed by PIPLC assay; **d** box plots showing surface localized fractions (red, probed with  $\alpha$ GFP<sup>ex</sup>) of total Bnl:GFP<sub>3</sub>-PC expressed in S2 cells before and after PIPLC treatment; box shows the median as well as 1<sup>st</sup> quartile and 3<sup>rd</sup> quartile, and whiskers are minimum and maximum; n represents # cells examined by imaging as shown in b,c; p value was calculated using unpaired two-tailed t-test; p=0.000649. **e,f** flow cytometric analyses of the same; **g** bar graphs showing quantitative values obtained from flow cytometry experiments depicting the average fraction of Bnl:GFP<sub>3</sub>-PC-expressing cells (GFP positive) containing surface localized Bnl:GFP<sub>3</sub>-PC<sup>ex</sup> ( $\alpha$ GFP<sup>ex</sup> immunostained (red)) before and after the PIPLC treatment; values represent the mean  $\pm$  SD from 3 independent experiments; p value was calculated using unpaired two-tailed t-test; total GFP+ events examined over 3 repeats: 3134 (control) and 2784 (+PIPLC);. Scale bars, 10  $\mu$ m. Source data are provided as a Source Data file.

### Supplementary Figure 5

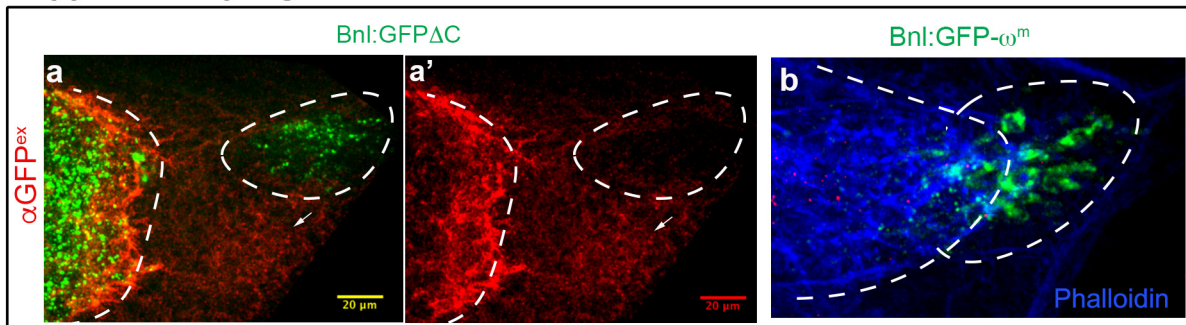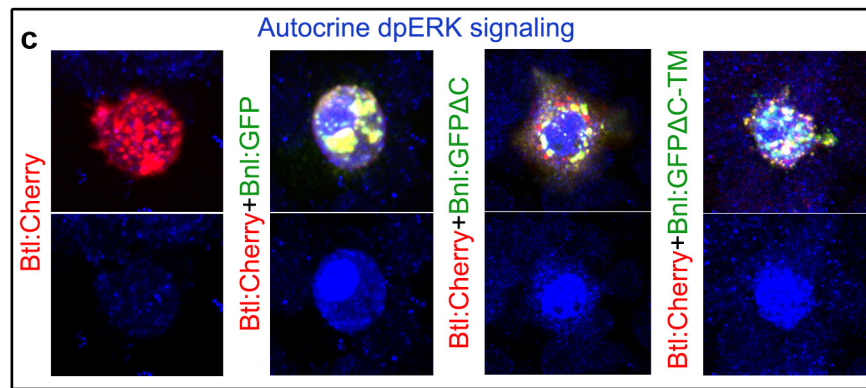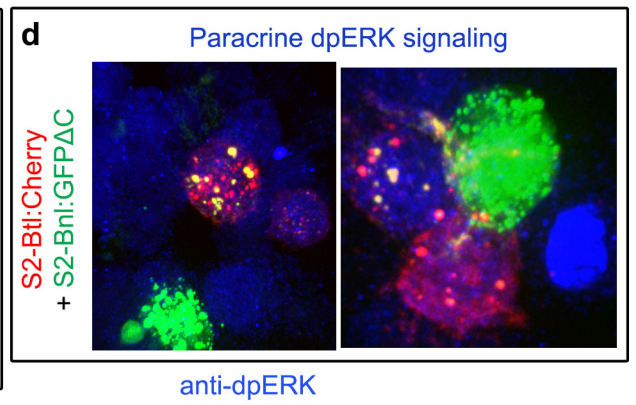

**Supplementary Figure 5. Autocrine and paracrine activity of Bnl variants.**

**a-b** Extracellular distribution of Bnl:GFP $\Delta$ C (a,a') and Bnl:GFP- $\omega^m$  (b), when expressed under *bnl-Gal4* in the wing disc source;  $\alpha$ GFP<sup>ex</sup> immunostaining (red) showing that Bnl:GFP $\Delta$ C is poorly retained on the source cell surface area (green punctate demarcated by dashed line), but are spread on the extracellular plane of the non-expressing disc cells (only red). ASP had both Bnl:GFP $\Delta$ C<sup>ex</sup> and internalized Bnl:GFP $\Delta$ C (probed only by GFP), showing non-autonomous signal dispersal. In contrast, Bnl:GFP- $\omega^m$  (b) is poorly externalized from the source and not received by the ASP (Phalloidin-stained). **c** Efficient autonomous MAPK signaling (nuclear dpERK, blue) of different Bnl:GFP variants when co-expressed with Btl:Cherry in S2 cells. **d** Inefficient non-autonomous MAPK signaling of Bnl:GFP $\Delta$ C when S2-Bnl:GFP $\Delta$ C cells were co-incubated with S2-Btl:Cherry cells.

Supplementary Figure 6

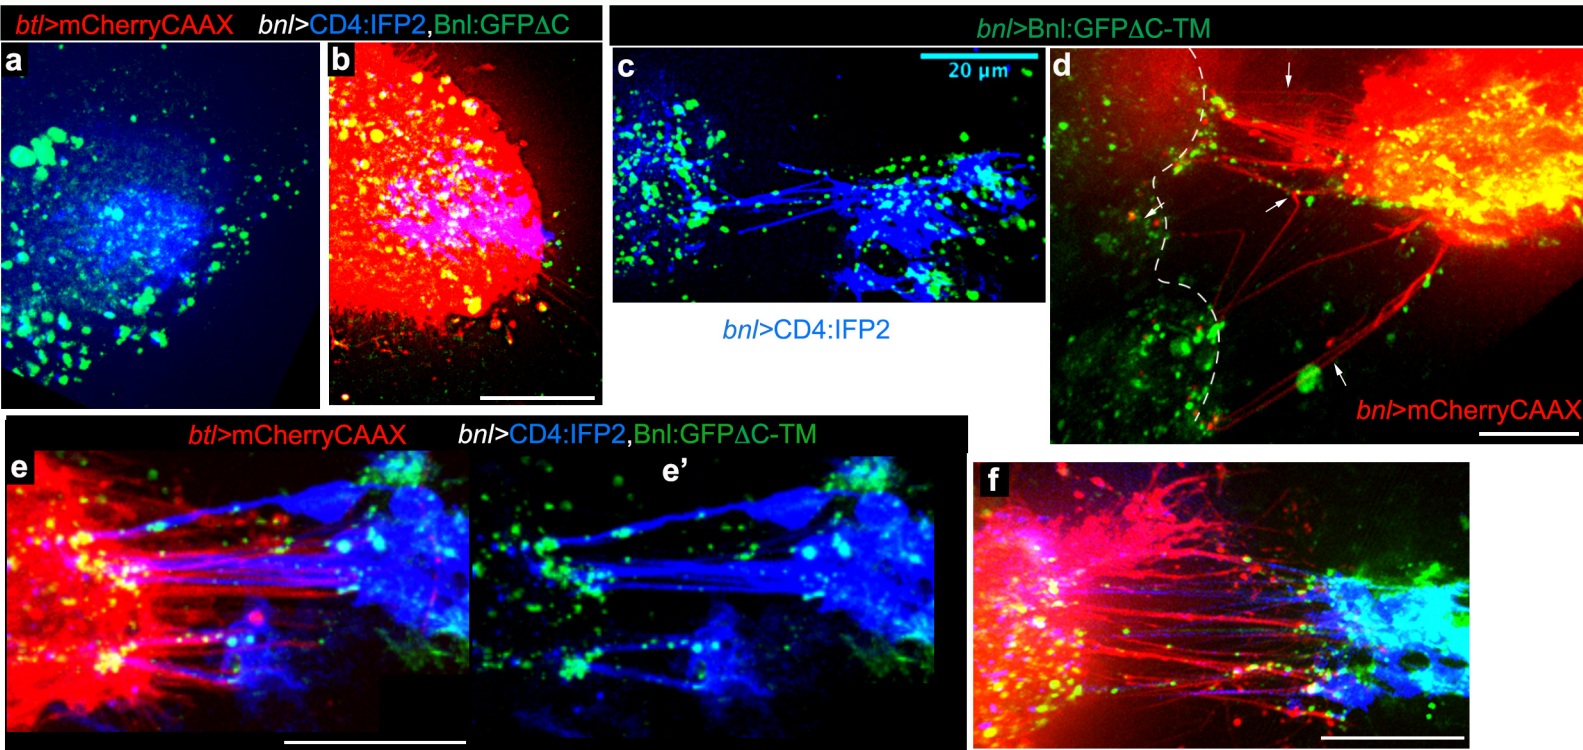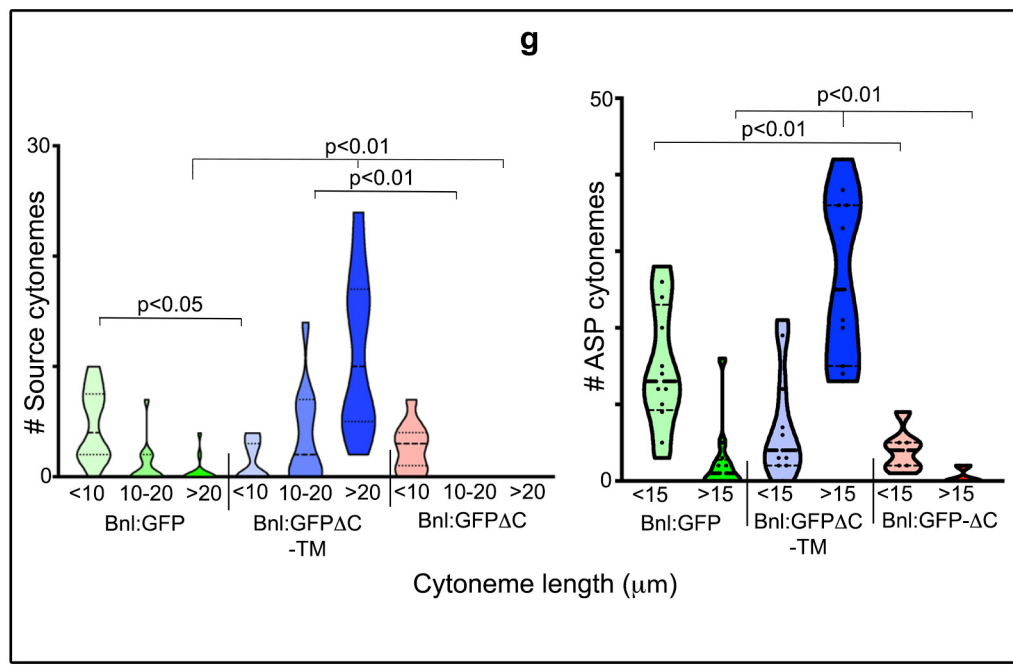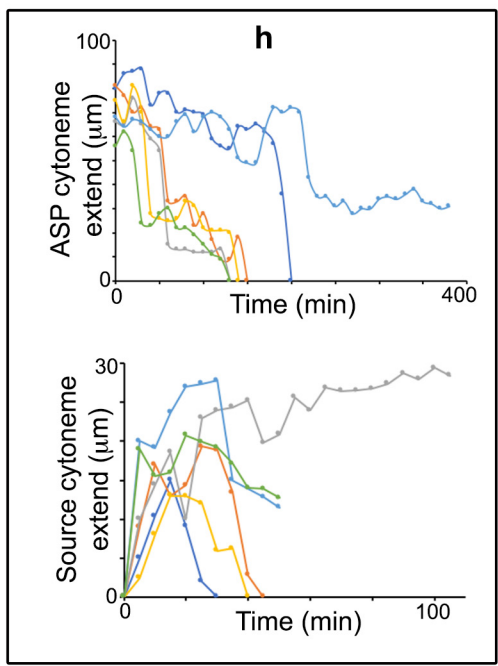

**Supplementary Figure 6. GPI-anchored Bnl induces cytoneme-mediated bidirectional matchmaking for contacts.**

**a** Split channels of Figure 6g, showing the random spread of Bnl:GFP $\Delta$ C from its source (blue, *bnl>CD4:IFP2*). **b** An example showing the loss of ASP cytonemes (red), when Bnl:GFP $\Delta$ C was overexpressed from CD4:IFP2-marked source cells (blue). **c** Split green and blue channels of Figure 6j showing Bnl:GFP $\Delta$ C-TM-containing source cytonemes contacting the ASP. **d-f** Examples showing CAM-like activity of Bnl:GFP $\Delta$ C-TM when expressed from the source: (d) Long polarized Bnl:GFP $\Delta$ C-TM-expressing source cytonemes (arrows) (red, *bnl>mCherryCAAX*) connected to the ASP and disc-associated transverse connective (dashed outline). (e-f) Bundles of ASP and source cytonemes interacting through Bnl:GFP $\Delta$ C-TM-enriched lateral contact sites; e', split blue and green channels of (e). **g** Violin plots showing a comparison of the number and length distribution of ASP and source cytonemes (from Fig. 6f-l) induced by Bnl:GFP, Bnl:GFP $\Delta$ C, or Bnl:GFP $\Delta$ C-TM, when overexpressed from the disc source; in violin plots, black dotted lines show the median as well as 25<sup>th</sup> and 75<sup>th</sup> percentiles; n=13 (Bnl:GFP, source), 11 (TM, source), 11 ( $\Delta$ C, source), 12 (Bnl:GFP, ASP), 11 (TM, ASP), 7 ( $\Delta$ C, ASP) biologically independent samples; p values were calculated using one way-ANOVA followed by Tukey's honestly significant different test. **h** Line plots showing dynamics of the source and recipient cytonemes as indicated when Bnl:GFP $\Delta$ C-TM was expressed in *bnl* source using *bnl-Gal4* (see Supplementary Table 1); the same color represents the interacting Bnl-receiving and -sending cytonemes from the same sample. All panels, live imaging. Scale bars, 20  $\mu$ m. Source data are provided as a Source Data file.

**Supplementary Figure 7**

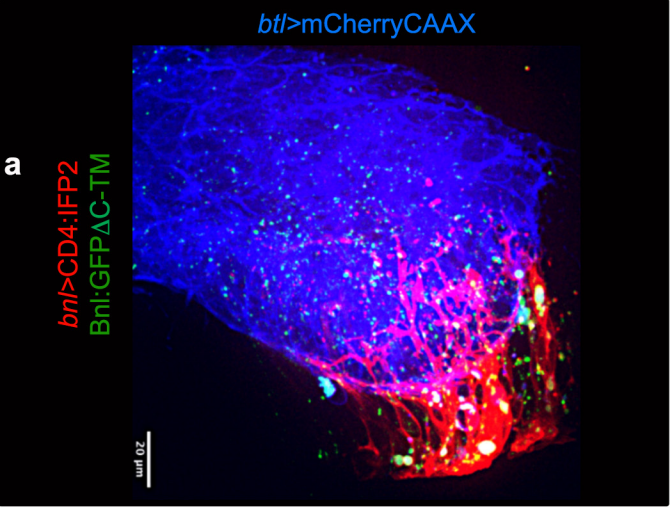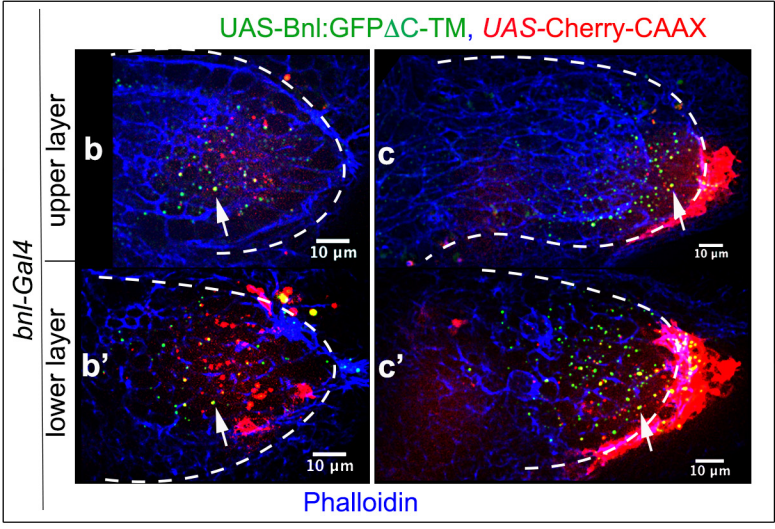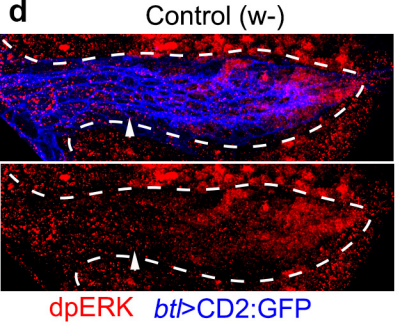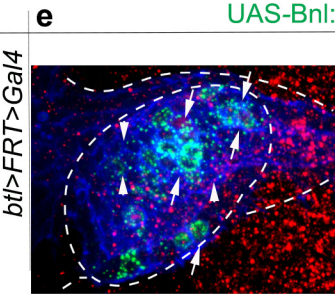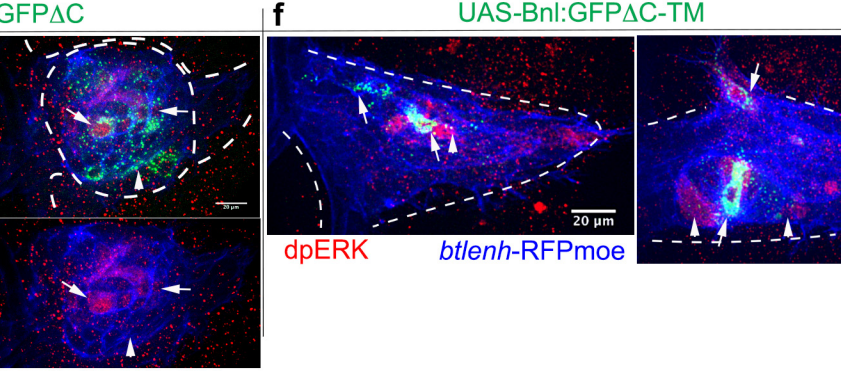

**g**

| Genotype                                                     | Sample # | Dispersal range (# cells) | % signal receiving ASP cells with nuclear dpERK | % clones induced growth | % clones induced branching |
|--------------------------------------------------------------|----------|---------------------------|-------------------------------------------------|-------------------------|----------------------------|
| <i>hsflp/+; btlenh&gt;FRT&gt;Gal4, btlenh-RFPmoe/UAS-"X"</i> |          |                           |                                                 |                         |                            |
| Bnl:GFP                                                      | 24       | 2.8±0.7                   | 99.2±2.3                                        | 83                      | 25                         |
| Bnl:GFP-TM                                                   | 33       | 2.3±0.8                   | 82.9±19.9                                       | 76                      | 36                         |
| Bnl:GFP-ΔGPI                                                 | 21       | 4.2±0.9                   | 36.9±27.4                                       | 81                      | 0                          |

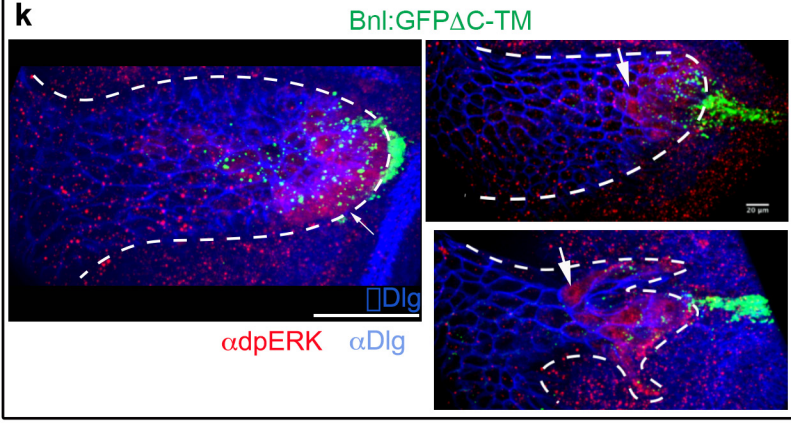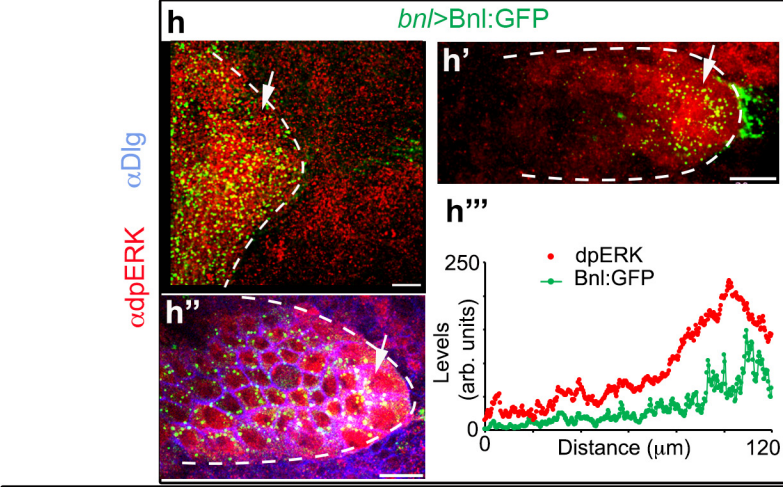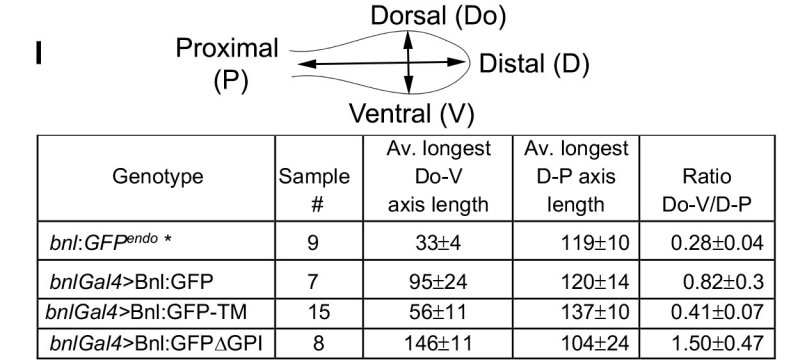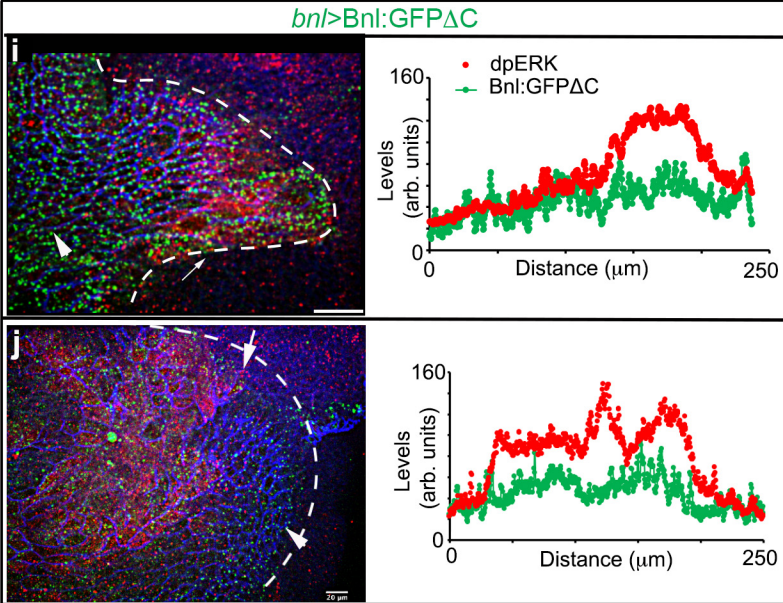

**Supplementary Figure 7. GPI anchoring is required for Bnl release and morphogen-like signaling.**

**a** Strong affinity and adhesion of Bnl:GFP $\Delta$ C-TM-expressing source cytonemes (red, *bnl>CD4:IFP2*) with the ASP surface (blue, *btl>mCherryCAAX*). **b-c'** Images of two wing discs expressing Bnl:GFP $\Delta$ C-TM and mCherryCAAX from the *bnl* source (red), showing endocytosed Bnl:GFP $\Delta$ C-TM puncta colocalized with the source membrane in upper and lower layer cells of the tubular ASP epithelium; Phalloidin-Alexa Fluor 647 (blue) marked cell outlines. **d** Control (*w-*) ASP showing the lack of nuclear dpERK in the ASP stalk and TC region, where the GOF clones were scored (see Fig. 9a-d). **e-g** Examples of ASPs with  $\Delta$ C or TM GOF clones (1-2 cell size) (arrows) and their non-autonomous signaling (arrowhead; red, dpERK). **g** Table showing non-autonomous effects of Bnl:GFP, TM, and  $\Delta$ C GOF clones in the ASP stalk; sample # (n) represents the number of clones examined over >10 biologically independent samples; values represent the mean  $\pm$  SD; p values for % signal receiving ASP cells with nuclear dpERK: p <0.01, for Bnl:GFP- $\Delta$ C vs. Bnl:GFP or Bnl:GFP $\Delta$ C-TM; p <0.05, for Bnl:GFP vs. Bnl:GFP $\Delta$ C-TM; p values were calculated using one way-ANOVA followed by Tukey's honestly significant different test. **h-l** Comparative analyses of the activity of Bnl:GFP, Bnl:GFP $\Delta$ C-TM (TM), and Bnl:GFP $\Delta$ C ( $\Delta$ C), expressed from wing disc source under *bnl-Gal4* (*bnl-Gal4 X UAS-X*): **(h-h''')** Wing discs expressing Bnl:GFP, showing a spatial coordination of signal distribution (green puncta), signaling patterns (dpERK, red), and ASP growth. **(i-k)** The coordination between signal distribution, signaling, and growth was uncoupled by  $\Delta$ C expression and was regained with TM. However, TM distribution was restricted in range in comparison to Bnl:GFP. **(l)** Comparison of ASP shapes in conditions as indicated; \*, homozygous *bnl:gfp<sup>endo</sup>* larvae used as the control for overexpressed Bnl:GFP variants; top panel, illustration showing the measurement of the longest Do-V and D-P axes ( $\mu$ m) from extended Z-projected ASP images; sample # (n) represents the number of biologically independent samples; values represent the mean  $\pm$  SD; p values: Do-V/D-P axes: p <0.01, *bnl:gfp<sup>endo</sup>* vs. Bnl:GFP or  $\Delta$ C and Bnl:GFP vs. TM or  $\Delta$ C; p values were calculated using one way-ANOVA followed by Tukey's honestly significant different test. h-k, arrows, recipient cells with signaling; arrowhead, recipient cells without signaling;  $\alpha$ Dlg (blue), cell outlines. All panels, dashed line shows ASP outline or ectopic tracheal outgrowth. Scale bars, 20  $\mu$ m; 10  $\mu$ m (b-c'). Source data are provided as a Source Data file.

## Supplementary Tables

**Supplementary Table 1. Quantification of the dynamics of the interacting cytonemes from Bnl-receiving and -sending cells.**

|                                  | FGF-receiving cells |                       |                             | FGF-sending cells |                       |                             |
|----------------------------------|---------------------|-----------------------|-----------------------------|-------------------|-----------------------|-----------------------------|
|                                  | WT                  | <i>bnl&gt;Bnl:GFP</i> | <i>bnl&gt;Bnl:GFP ΔC-TM</i> | WT                | <i>bnl&gt;Bnl:GFP</i> | <i>bnl&gt;Bnl:GFP ΔC-TM</i> |
| Lifetime (min)                   | 19.55<br>±6.1       | 17.5±5*               | 180±101.39                  | 7.73±<br>4.67     | ND                    | 46.67±30.11                 |
| # Fluctuating peaks/lifetime     | 1±0                 | 1±0                   | 4.33±2.66                   | 1±0               | ND                    | 2.33±1.37                   |
| Maximum extension (μm)           | 19.36<br>±7.4       | 15.8±3.8              | 76.67±8.98                  | 8.35±4.04         | ND                    | 26.52±7.3                   |
| Average extension rate (μm/min)  | 1.28<br>±0.79       | 0.85±0.32             | 0.47±0.15                   | 1.13±0.57         | ND                    | 0.70±0.23                   |
| Average retraction rate (μm/min) | 1.37<br>±0.75       | 0.93±0.19             | 0.88±0.22                   | 1.32±0.56         | ND                    | 0.79±0.26                   |

Note: Maximum extension - the maximum length of a cytoneme during its lifetime. Peak - Each extension and retraction cycle within the lifetime of a cytoneme. Number of fluctuating peaks/lifetime - the number of extension and retraction cycles of a cytoneme. Average extension and retraction rates - measured by the net cytoneme length change/time during its extension or retraction.

\*, For this condition, 4 long cytonemes were used. Most cytonemes (N=25) were short in length and had lifetime <10 min and was not counted in 10 min interval time-lapse movies.

Values represent mean ± SD. N=11 cytonemes for WT; 6 cytonemes for *bnl>Bnl:GFPΔC-TM* receiving and sending cytonemes; 4 cytonemes for *bnl>Bnl:GFP* receiving cytonemes. p values (WT vs *bnl>Bnl:GFPΔC-TM*) for receiving cytoneme dynamics: lifetime, p <0.0001; # fluctuating peaks/lifetime, p <0.001; maximum extension, p <0.0001; average extension rate, p =0.025; average retraction rate, no significant difference. p values for sending cytoneme dynamics: lifetime, p <0.001; # fluctuating peaks/lifetime, p =0.0046; maximum extension, p <0.001; average extension rate, no significant difference; average retraction rate, p =0.047. p values were calculated using unpaired two-tailed t test. p < 0.05 is considered significant. Source data are provided as a Source Data file.

Genotypes: WT: *btlGal4,UAS-CD8:GFP/+;bnlLexA,LexO-mCherryCAAX/+*.

*bnl>Bnl:GFP*: *btlLexA,LexO-mCherryCAAX/UAS-CD4:mIFP; bnlGal4/UAS-Bnl:GFP*.

*bnl>Bnl:GFPΔC-TM*: *UAS-Bnl:GFPΔC-TM/UAS-CD4:mIFP; bnlGal4/btlLexA,LexO-mCherryCAAX* for FGF-receiving cytonemes, and *UAS-mCherryCAAX/UAS-Bnl:GFPΔC-TM; bnlGal4/+* for FGF-sending cytonemes.



**Supplementary Table 2. Comparison of the ASP and source cytoneme numbers when *diaRNAi* was expressed in the ASP.**

|                                 |         | # ASP cytonemes < 15 $\mu$ m | # ASP cytonemes > 15 $\mu$ m | # FGF source cytonemes |
|---------------------------------|---------|------------------------------|------------------------------|------------------------|
| Control (N=11)                  | Average | 11.55                        | 17                           | 9.45                   |
|                                 | SD      | $\pm$ 4.57                   | $\pm$ 4.96                   | $\pm$ 3.30             |
| <i>btlGal4&gt;diaRNAi</i> (N=8) | Average | 10                           | 1                            | 0                      |
|                                 | SD      | $\pm$ 7.66                   | $\pm$ 1.06                   | $\pm$ 0.35             |
| <i>p</i> (unpaired t-test)      |         | 0.559367458                  | 5.87525E-08                  | 4.27454E-07            |

Note: Values represent mean  $\pm$  SD. N represents the number of biologically independent samples. *p* values were calculated using unpaired two-tailed t test. Source data are provided as a Source Data file.

Genotypes: Control: *btlGal4,UAS-CD8GFP/+;bnlLexA,LexO-mCherryCAAX/+*.

*btl-Gal4>diaRNAi*: *btlGal4,UAS-CD8GFP/tub-Gal80<sup>ts</sup>;bnl-LexA,LexO-mCherryCAAX/ UAS-diaRNAi*.

**Supplementary Table 3: Autocrine and paracrine MAPK signaling activity of Bnl:GFP variants in S2 cells**

**a. Autocrine activity: S2-Btl:Cherry co-expressed with Bnl:GFP variants**

| S2 cell co-expression               | # total Btl cells | # Btl cells with nuclear dpERK | % Btl cells with nuclear dpERK |
|-------------------------------------|-------------------|--------------------------------|--------------------------------|
| Bnl:GFP+Btl:Cherry                  | 15                | 14                             | 93                             |
| Bnl:GFP $\Delta$ GPI+Btl:Cherry     | 22                | 21                             | 95                             |
| Bnl:GFP $\Delta$ GPI-TM +Btl:Cherry | 16                | 15                             | 94                             |

**b. Paracrine activity: S2-Bnl:GFP variants co-incubated with S2-Btl:Cherry**

| S2-Btl:Cherry cells (# or %)                                                 | Bnl:GFP +Btl:Cherry | Bnl:GFP $\Delta$ GPI +Btl:Cherry | Bnl:GFP $\Delta$ GPI-TM +Btl:Cherry |
|------------------------------------------------------------------------------|---------------------|----------------------------------|-------------------------------------|
| # of total cells (A)                                                         | 169                 | 188                              | 123                                 |
| # of (A) with dpERK                                                          | 76                  | 65                               | 60                                  |
| % of (A) with dpERK                                                          | 44.9                | 34.6*                            | 48.8                                |
| # of trans-paired cells with S2-Bnl:GFP/TM or adjacent to S2- $\Delta$ C (B) | 78                  | 33                               | 87                                  |
| # of (B) with dpERK                                                          | 71                  | 5                                | 58                                  |
| % of (B) with dpERK                                                          | 91                  | 15**                             | 67                                  |
| # of uncoupled Btl +ve cells (C)                                             | 91                  | 188                              | 36                                  |
| # of (C) with dpERK                                                          | 5                   | 60                               | 2                                   |
| % of (C) with dpERK                                                          | 5                   | 32 **                            | 6                                   |

Note: data represents results from three independent transfection repeats.

**Supplementary Table 4: Resources and reagents used in this study**

| REAGENT or RESOURCE                                                             | DESCRIPTION                            | SOURCE                                                 |
|---------------------------------------------------------------------------------|----------------------------------------|--------------------------------------------------------|
| Antibodies                                                                      |                                        |                                                        |
| Mouse monoclonal anti-Discs large (Dlg)                                         | 1:100                                  | DSHB, Cat# 4F3 anti-discs large; RRID: AB_528203       |
| Phospho-p44/42 MAPK (Erk1/2) (Thr202/Tyr204) rabbit monoclonal antibody (dpERK) | 1:250 in tissue and 1:1000 in S2 cells | Cell signaling Technology; Cat# 4370; RRID: AB_2315112 |
| Rat monoclonal anti-HA (3F10)                                                   | 1:1000 for standard and 1:500 for EIF  | Roche; Cat#1186742300 1; RRID: AB_390918               |
| Rabbit polyclonal anti-Bnl                                                      | 1:500 for EIF <sup>1</sup>             | N/A                                                    |
| Rabbit anti-GFP antibody                                                        | 1:3000 for EIF                         | Abcam; Cat# ab6556; RRID: AB_305564                    |
| Goat anti-Mouse IgG (H+L), Alexa Fluor 555                                      | 1:1000                                 | Thermo Fisher Scientific; A21434                       |
| Goat anti-Mouse IgG (H+L), Alexa Fluor 647                                      | 1:1000                                 | Thermo Fisher Scientific; A28181                       |
| Goat anti-Rat IgG (H+L), Alexa Fluor 647                                        | 1:1000                                 | Thermo Fisher Scientific; A21247                       |
| Goat anti-Rabbit IgG (H+L), Alexa Fluor 555                                     | 1:1000                                 | Thermo Fisher Scientific; A21428                       |
| Goat anti-Rabbit IgG (H+L), Alexa Fluor 647                                     | 1:1000                                 | Thermo Fisher Scientific; A21244                       |
| Bacterial and Virus Strains                                                     |                                        |                                                        |
| DH5 Alpha                                                                       |                                        |                                                        |
| Chemicals, Peptides, and Recombinant Proteins                                   |                                        |                                                        |
| Alexa Fluor 647 Phalloidin                                                      | Thermo Fisher Scientific               | Cat# A22287, RRID: AB_2620155                          |
| Furin Inhibitor I - Calbiochem                                                  | Sigma-Aldrich                          | Cat# 344930                                            |
| Furin Inhibitor II - Calbiochem                                                 | Sigma-Aldrich                          | Cat# 344931                                            |
| Phospholipase C, Phosphatidylinositol-specific from <i>Bacillus cereus</i>      | Invitrogen                             | Cat# P6466                                             |
| Critical Commercial Assays                                                      |                                        |                                                        |
| Lipofectamine 3000 Transfection Reagent                                         | Thermo Fisher Scientific               | Cat# L3000008                                          |
| Mirus TransIT <sup>®</sup> -Insect Transfection Reagent                         | Mirus Bio                              |                                                        |
| TRI Reagent                                                                     | Sigma-Aldrich                          | Cat# T9424                                             |
| OneTaq <sup>®</sup> One-Step RT-PCR Kit                                         | NEB                                    | Cat# E5315S                                            |
| Deposited Data                                                                  |                                        |                                                        |
| Raw data from all the figures                                                   | This paper                             |                                                        |
| Experimental Models: Cell Lines                                                 |                                        |                                                        |
| <i>D. melanogaster</i> . Cell line S2: S2-DRSC                                  | Laboratory of Thomas B. Kornberg       | FlyBase: FBtc0000181                                   |
| Experimental Models: Organisms/Strains                                          |                                        |                                                        |
| <i>D. melanogaster</i> . UAS-Bnl:GFP $\Delta$ C                                 | This paper                             | N/A                                                    |
| <i>D. melanogaster</i> . UAS-Bnl:GFP $\Delta$ C-TM                              | This paper                             | N/A                                                    |

|                                                                                                                                           |            |        |
|-------------------------------------------------------------------------------------------------------------------------------------------|------------|--------|
| <i>D. melanogaster. UAS-Bnl:GFP<math>\Delta</math>C<sub>168</sub>-TM</i>                                                                  | This paper | N/A    |
| <i>D. melanogaster. UAS-Bnl:GFP<math>\Delta</math>C<sub>168</sub></i>                                                                     | This paper | N/A    |
| <i>D. melanogaster. LexO-BtlDN:Cherry</i>                                                                                                 | This paper | N/A    |
| <i>D. melanogaster. UAS-Bnl:GFP-<math>\omega^m</math></i>                                                                                 | This paper | N/A    |
| <i>D. melanogaster. bnl:gfp<sup>endo</sup></i>                                                                                            | 1          | N/A    |
| <i>D. melanogaster. btl:cherry<sup>endo</sup></i>                                                                                         | 1          | N/A    |
| <i>D. melanogaster. UAS-Bnl:GFP</i>                                                                                                       | 2          | N/A    |
| <i>D. melanogaster. UAS-CD8:GFP</i>                                                                                                       | BDSC       | 5137   |
| <i>D. melanogaster. UAS-nlsGFP</i>                                                                                                        | BDSC       | 4776   |
| <i>D. melanogaster. UAS-mCherryCAAX</i>                                                                                                   | BDSC       | 59021  |
| <i>D. melanogaster. UAS-CD4:mIFP</i>                                                                                                      | BDSC       | 64182  |
| <i>D. melanogaster. lexO-mCherryCAAX</i>                                                                                                  | 3          | N/A    |
| <i>D. melanogaster. UAS-Btl<sup>DN</sup></i>                                                                                              | 4          | N/A    |
| <i>D. melanogaster. UAS-Bnl</i>                                                                                                           | BDSC       | 64232  |
| <i>D. melanogaster. UAS-diaRNAi</i>                                                                                                       | BDSC       | 33424  |
| <i>D. melanogaster. UAS-Dia-GFP</i>                                                                                                       | 3          | N/A    |
| <i>D. melanogaster. UAS-<math>\Delta</math>DAD-Dia-GFP</i>                                                                                | 3          | N/A    |
| <i>D. melanogaster. bnl-LexA</i>                                                                                                          | 1          | N/A    |
| <i>D. melanogaster. bnl-Gal4</i>                                                                                                          | BDSC       | 112825 |
| <i>D. melanogaster. btl-Gal4</i>                                                                                                          | 5          | N/A    |
| <i>D. melanogaster. btl-LHG</i>                                                                                                           | 3          | N/A    |
| <i>D. melanogaster. hs-FLP; btl&gt;y+&gt;Gal4, btl-mRFP1moe</i>                                                                           | 6          | N/A    |
| <i>D. melanogaster. hs-mFlp</i>                                                                                                           | BDSC       | N/A    |
| <i>D. melanogaster. FlyBow FB2.0</i>                                                                                                      | BDSC       | N/A    |
| <i>D. melanogaster. btl:GFP fTRG</i>                                                                                                      | VDRC       | 318302 |
| <i>D. melanogaster. hs-Flp</i>                                                                                                            | BDSC       | 6      |
| <i>D. melanogaster. tub-Gal80<sup>ts</sup></i>                                                                                            | BDSC       | 7108   |
| <i>D. melanogaster. act&gt;CD2&gt;Gal4</i>                                                                                                | BDSC       | 4780   |
| <i>D. melanogaster. w<sup>1118</sup></i>                                                                                                  | BDSC       | 3605   |
| Oligonucleotides                                                                                                                          |            |        |
| Primer for cloning <i>UAS-Bnl:GFP<math>\Delta</math>C</i> :<br>GCCAAGCTTGCATGCCGGTACCTTAGTAGCTCGCATCTT<br>CTAGGGATCC                      | This paper | N/A    |
| Primer for cloning <i>UAS-Bnl:GFP<math>\Delta</math>C-TM</i> :<br>CCCTAGAAGATGCGAGCTACGACTTCGCCTGTGATATTT<br>ACATCTGG                     | This paper | N/A    |
| Primer for cloning <i>UAS-Bnl:GFP<math>\Delta</math>C-TM</i> :<br>GATGTAAATATCACAGGCCGAAGTCGTAGCTCGCATCTTC<br>TAGGGATCC                   | This paper | N/A    |
| Primer for cloning <i>UAS-Bnl:GFP<math>\Delta</math>C-TM</i> :<br>GCCAAGCTTGCATGCCGGTACCTTAGTGGTAGCAGATG<br>AGAGTGATGATC                  | This paper | N/A    |
| Primer for cloning <i>UAS-Bnl:GFP<math>\Delta</math>C<sub>168</sub></i> :<br>GCCAAGCTTGCATGCCATATATTCTAGATTACTTCTTCTT<br>GCCTCCGTGCTG     | This paper | N/A    |
| Primer for cloning <i>UAS-Bnl:GFP<math>\Delta</math>C<sub>168</sub>-TM</i> :<br>CAGCACGGAGGCAAGAAGgacttcgctgtgatatttacatctgg              | This paper | N/A    |
| Primer for cloning <i>UAS-Bnl:GFP<math>\Delta</math>C<sub>168</sub>-TM</i> :<br>ccagatgtaaatatcacaggcgaagtcCTTCTTCTGCCTCCGTGCT<br>G       | This paper | N/A    |
| Primer for cloning <i>UAS-Bnl:HA<sub>1</sub>GFP<sub>3</sub>Cherry<sub>c</sub></i> :<br>GTTTTGCTCCGAAAAAGGCCATCTGATGGTGAGCAAG<br>GGCGAGGAG | This paper | N/A    |
| Primer for cloning <i>UAS-Bnl:HA<sub>1</sub>GFP<sub>3</sub>Cherry<sub>c</sub></i> :<br>GCTGCTGGTACCTTACTTGTACAGCTCGTCCATGCCG              | This paper | N/A    |

|                                                                                                                                            |                                                                                                                                                                                                                    |     |
|--------------------------------------------------------------------------------------------------------------------------------------------|--------------------------------------------------------------------------------------------------------------------------------------------------------------------------------------------------------------------|-----|
| Primer for cloning <i>UAS-Bnl:GFP-<math>\omega^m</math></i> :<br>CGAGGCCCAAGGACGCCCCACCAGGCGGCGACGAT<br>TCG                                | This paper                                                                                                                                                                                                         | N/A |
| Primer for cloning <i>UAS-Bnl:GFP-<math>\omega^m</math></i> :<br>CGAATCGTCGCCGCTGGTGGGGGGCGTCCTTGGGCC<br>TCG                               | This paper                                                                                                                                                                                                         | N/A |
| Primer for cloning <i>UAS-bGFP-GPI</i> :<br>CAACAACCTTGACAATGTCCAAGGGCGAGGAG                                                               | This paper                                                                                                                                                                                                         | N/A |
| Primer for cloning <i>UAS-bGFP-GPI</i> :<br>GCCCTTGGACATTGTCAAGTTGTTGTCCATGGCC                                                             | This paper                                                                                                                                                                                                         | N/A |
| Primer for cloning <i>UAS-bGFP-GPI</i> :<br>TGGATGAGCTGTACAAGACCGAGGGCGACGGTG                                                              | This paper                                                                                                                                                                                                         | N/A |
| Primer for cloning <i>UAS-bGFP-GPI</i> :<br>TCGGTCTTGACAGCTCATCCATGCC                                                                      | This paper                                                                                                                                                                                                         | N/A |
| Primer for cloning <i>UAS-Bnl:GFP<math>\Delta</math>FGF</i> :<br>CCCTTGGACATGGACTGTGGCACCGTGG                                              | This paper                                                                                                                                                                                                         | N/A |
| Primer for cloning <i>UAS-Bnl:GFP<math>\Delta</math>FGF</i> :<br>TGCCACAGTCCATGTCCAAGGGCGAGGAGC                                            | This paper                                                                                                                                                                                                         | N/A |
| Primer for cloning <i>UAS-Bnl:GFP<math>\Delta</math>FGF</i> :<br>CACCGTCTTGACAGCTCATCCATGCC                                                | This paper                                                                                                                                                                                                         | N/A |
| Primer for cloning <i>UAS-Bnl:GFP<math>\Delta</math>FGF</i> :<br>ATGAGCTGTACAAGACGGTGGCGCAGGAG                                             | This paper                                                                                                                                                                                                         | N/A |
| Forward primer for cloning all the constructs above:<br>AATTCGAGCTCGGTACAGATCTATGCGAAGAAACCTGCG<br>C                                       | This paper                                                                                                                                                                                                         | N/A |
| Primer for cloning <i>UAS-sBtl:Cherry</i> :<br>AATTCGAGCTCGGTACCTCGAGATGGCAAAGTGCCGAT<br>CACG                                              | This paper                                                                                                                                                                                                         | N/A |
| Primer for cloning <i>UAS-sBtl:Cherry</i> :<br>GCCGCCTTGCCCTCGACAGGATGGGCGTGCAGCAG                                                         | This paper                                                                                                                                                                                                         | N/A |
| Primer for cloning <i>UAS-sBtl:Cherry</i> :<br>GTGCGAGGGGCAAGGCGGCatggtgagcaagggcgag                                                       | This paper                                                                                                                                                                                                         | N/A |
| Primer for cloning <i>UAS-sBtl:Cherry</i> :<br>GCCAAGCTTGCATGCCTCTAGAttactgtacagctcgccatgcc                                                | This paper                                                                                                                                                                                                         | N/A |
| Forward primer for <i>bnl</i> RT-PCR:<br>CAGGAGGACACTACAATTGCCAG                                                                           | This paper                                                                                                                                                                                                         | N/A |
| Reverse primer for <i>bnl</i> -RA RT-PCR:<br>GCTGCAGACACAGGAAATCG                                                                          | This paper                                                                                                                                                                                                         | N/A |
| Reverse primer for <i>bnl</i> -PC RT-PCR:<br>GGGACAACAGTCCGAAATCG                                                                          | This paper                                                                                                                                                                                                         | N/A |
| Primer for cloning <i>UAS-Bnl<sup>PC</sup>:GFP</i> :<br>GCCAAGCTTGCATGCCATATATTCTAGATCATCGCCGGG<br>GGGACAACAGTCCGAAATCGTAGTAGAGCGAATCGTCCG | This paper                                                                                                                                                                                                         | N/A |
| Recombinant DNA                                                                                                                            |                                                                                                                                                                                                                    |     |
| pUAST-Bnl:GFP                                                                                                                              | 2                                                                                                                                                                                                                  | N/A |
| pUAST-Bnl:HA                                                                                                                               | 2                                                                                                                                                                                                                  |     |
| pUAST-Bnl:HA <sub>1</sub> GFP <sub>3</sub> ( <i>UAS</i> -HA <sub>1</sub> Bnl:GFP <sub>3</sub> )                                            | 2                                                                                                                                                                                                                  |     |
| pUAST-GFP-GPI                                                                                                                              | 7                                                                                                                                                                                                                  | N/A |
| pUAST-cSpi:GFP                                                                                                                             | 8                                                                                                                                                                                                                  | N/A |
| pUAST-Bnl:GFP $\Delta$ C <sub>40</sub> ( $\Delta$ C) & -Bnl:GFP $\Delta$ C <sub>168</sub>                                                  | <i>UAS-Bnl:HA<sub>1</sub>GFP<sub>3</sub></i> by deleting the last 40 (after Y <sub>730</sub> of Bnl) and 168 (after K <sub>602</sub> of Bnl) amino acid regions, respectively, prior to a stop codon.              | N/A |
| pUAST-Bnl:GFP $\Delta$ C-TM & -Bnl:GFP $\Delta$ C-TM <sub>168</sub>                                                                        | a 31 amino acid long transmembrane domain of the mammalian CD8a protein fused to the C-terminus of <i>UAS-Bnl:GFP<math>\Delta</math>C</i> and <i>UAS-Bnl:GFP<math>\Delta</math>C<sub>168</sub></i> , respectively. | N/A |

|                                                |                                                                                                                                                                    |                                                                                                           |
|------------------------------------------------|--------------------------------------------------------------------------------------------------------------------------------------------------------------------|-----------------------------------------------------------------------------------------------------------|
| pUAST-Bnl:GFP <sub>3</sub> Cherry <sub>c</sub> | <i>UAS-Bnl:HA<sub>1</sub>GFP<sub>3</sub></i> with a C-terminal mCherry tag with a linker (VEGQGG) placed in between.                                               | N/A                                                                                                       |
| pUAST-Bnl <sub>PC</sub> :GFP                   | The PC-specific C-terminal 24 bp sequence (7 amino acids+stop) was added to the C-terminus of the 1-2259 bp region of <i>bnl-PA</i> CDS using PCR                  | N/A                                                                                                       |
| pUAST-Bnl:GFP- $\omega^m$                      | <i>UAS-Bnl:HA<sub>1</sub>GFP<sub>3</sub></i> with mutated $\omega$ , $\omega+1$ , and $\omega+2$ sites (S/P <sup>741</sup> G/P <sup>742</sup> A/P <sup>743</sup> ) | N/A                                                                                                       |
| pUAST-bGFP-GPI                                 | secGFP <sup>1</sup> (superfolder GFP with N-terminal Bnl signal peptide) added with the last 53 amino acids of Bnl (from T <sub>718</sub> ) at the C-terminus.     | N/A                                                                                                       |
| pUAST-sBtl:Cherry                              | mCherry sequence was added in-frame after P <sup>607</sup> of Btl, replacing the TM and intracellular portions.                                                    | N/A                                                                                                       |
| pUAST-BtlDN:Cherry and pLot-BtlDN:Cherry       | mCherry sequence was added in-frame after L <sub>625</sub> of Btl, replacing the intracellular C-terminal portions.                                                | N/A                                                                                                       |
| pUAST-Bnl:GFP <sup>ΔFGF</sup>                  | Conserved FGF domain of Bnl was replaced with a sfGFP sequence                                                                                                     | N//A                                                                                                      |
| Software and Algorithms                        |                                                                                                                                                                    |                                                                                                           |
| Fiji                                           | ImageJ                                                                                                                                                             | <a href="https://fiji.sc">https://fiji.sc</a>                                                             |
| Prism 8.0                                      | GraphPad                                                                                                                                                           | <a href="https://www.graphpad.com/">https://www.graphpad.com/</a>                                         |
| Adobe Photoshop                                | Adobe                                                                                                                                                              | <a href="https://www.adobe.com">https://www.adobe.com</a>                                                 |
| Adobe Illustrator                              | Adobe                                                                                                                                                              | <a href="https://www.adobe.com">https://www.adobe.com</a>                                                 |
| Microsoft Excel                                | Microsoft                                                                                                                                                          | <a href="https://www.office.com">https://www.office.com</a>                                               |
| SnapGene                                       | SnapGene                                                                                                                                                           | <a href="https://www.snapgene.com">https://www.snapgene.com</a>                                           |
| MacVector                                      | MacVector                                                                                                                                                          | <a href="https://macvector.com">https://macvector.com</a>                                                 |
| PredGPI predictor                              |                                                                                                                                                                    | <a href="http://gpcr.biocomp.unibo.it/predgpi/pred.htm">http://gpcr.biocomp.unibo.it/predgpi/pred.htm</a> |
| VassarStats                                    |                                                                                                                                                                    | <a href="http://vassarstats.net">vassarstats.net</a>                                                      |
| R x64 3.3.1                                    | R                                                                                                                                                                  | <a href="http://r-project.org">r-project.org</a>                                                          |
| Imaris 9.5.0                                   | Imaris                                                                                                                                                             | <a href="https://imaris.oxinst.com">https://imaris.oxinst.com</a>                                         |

## Supplementary Notes

### A. Expression analyses of *bnl* splice variants using RT-PCR

The *bnl* gene has two different splice variants encoding proteins with different C-terminal

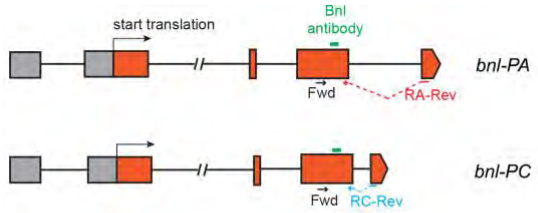

hydrophobic sequences. To check the expression of different *bnl* isoforms, total RNA was extracted from 20 *w<sup>1118</sup>* larval wing discs and RT-PCR was performed on the total RNA. For both isoforms, we used a common forward primer that binds to exon 3 (5'-CAGGAGGACACTCACAATTGCCAG-3').

However, the reverse primers were either PA- (5'-GCTGCAGACACAGGAAATCG-3') and PC- (5'-GGGACAACAGTCCGAAATCG-3') -specific. The reverse primer for each isoform was designed to span the junction between exon 3 and the isoform-specific last exon as illustrated below. The expected amplicon size was 697bp. As a negative control, RT-PCR was carried out on the genomic DNA (gDNA)

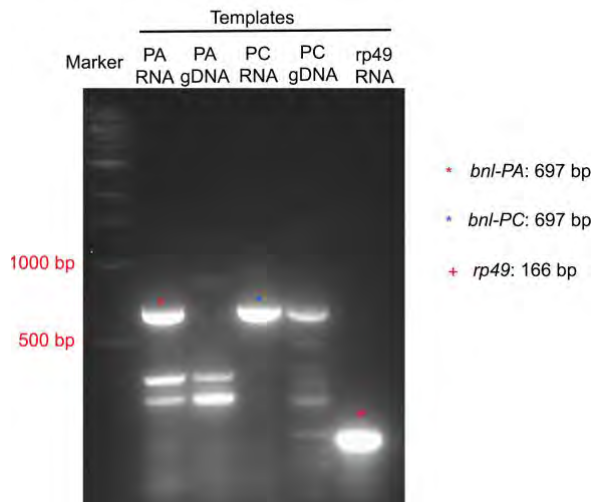

template obtained from *w<sup>1118</sup>* flies. As a positive control we performed RT-PCR for constitutive *rp49* gene. Unsurprisingly, RT-PCR results showed strong amplification of *bnl-PA*, exclusively from the RNA template. Although we detected strong *bnl-PC* amplification from the RNA template, we also detected a low level amplification of the same sized RT-PCR product from gDNA. These results confirmed *bnl-PA* expression in the wing disc. These results, although not conclusive, also suggested that the wing disc expresses *bnl-PC*. Moreover, a Bnl antibody, which detects both isoforms, showed that the native Bnl<sup>ex</sup> is asymmetrically localized on the wing disc producing cell surface and the Bnl<sup>ex</sup> was reduced with the PIPLC treatment. Secondly, S2 cells expressing a chimeric Bnl<sup>PC</sup>:GFP construct showed the PIPLC-sensitive surface distribution of the protein. Based on these results, we suggest that irrespective of the tissue-specific expression levels, Bnl isoforms are GPI-anchored on the cell surface. Consistent RT-PCR results were obtained from three independent experiments, confirming the expression profile.

## B. Bioinformatic analyses of hydropathy and secondary topology of various Bnl constructs

Note: hydropobicity plots - Sweet/Eisenberg hydropobicity: Window = 11

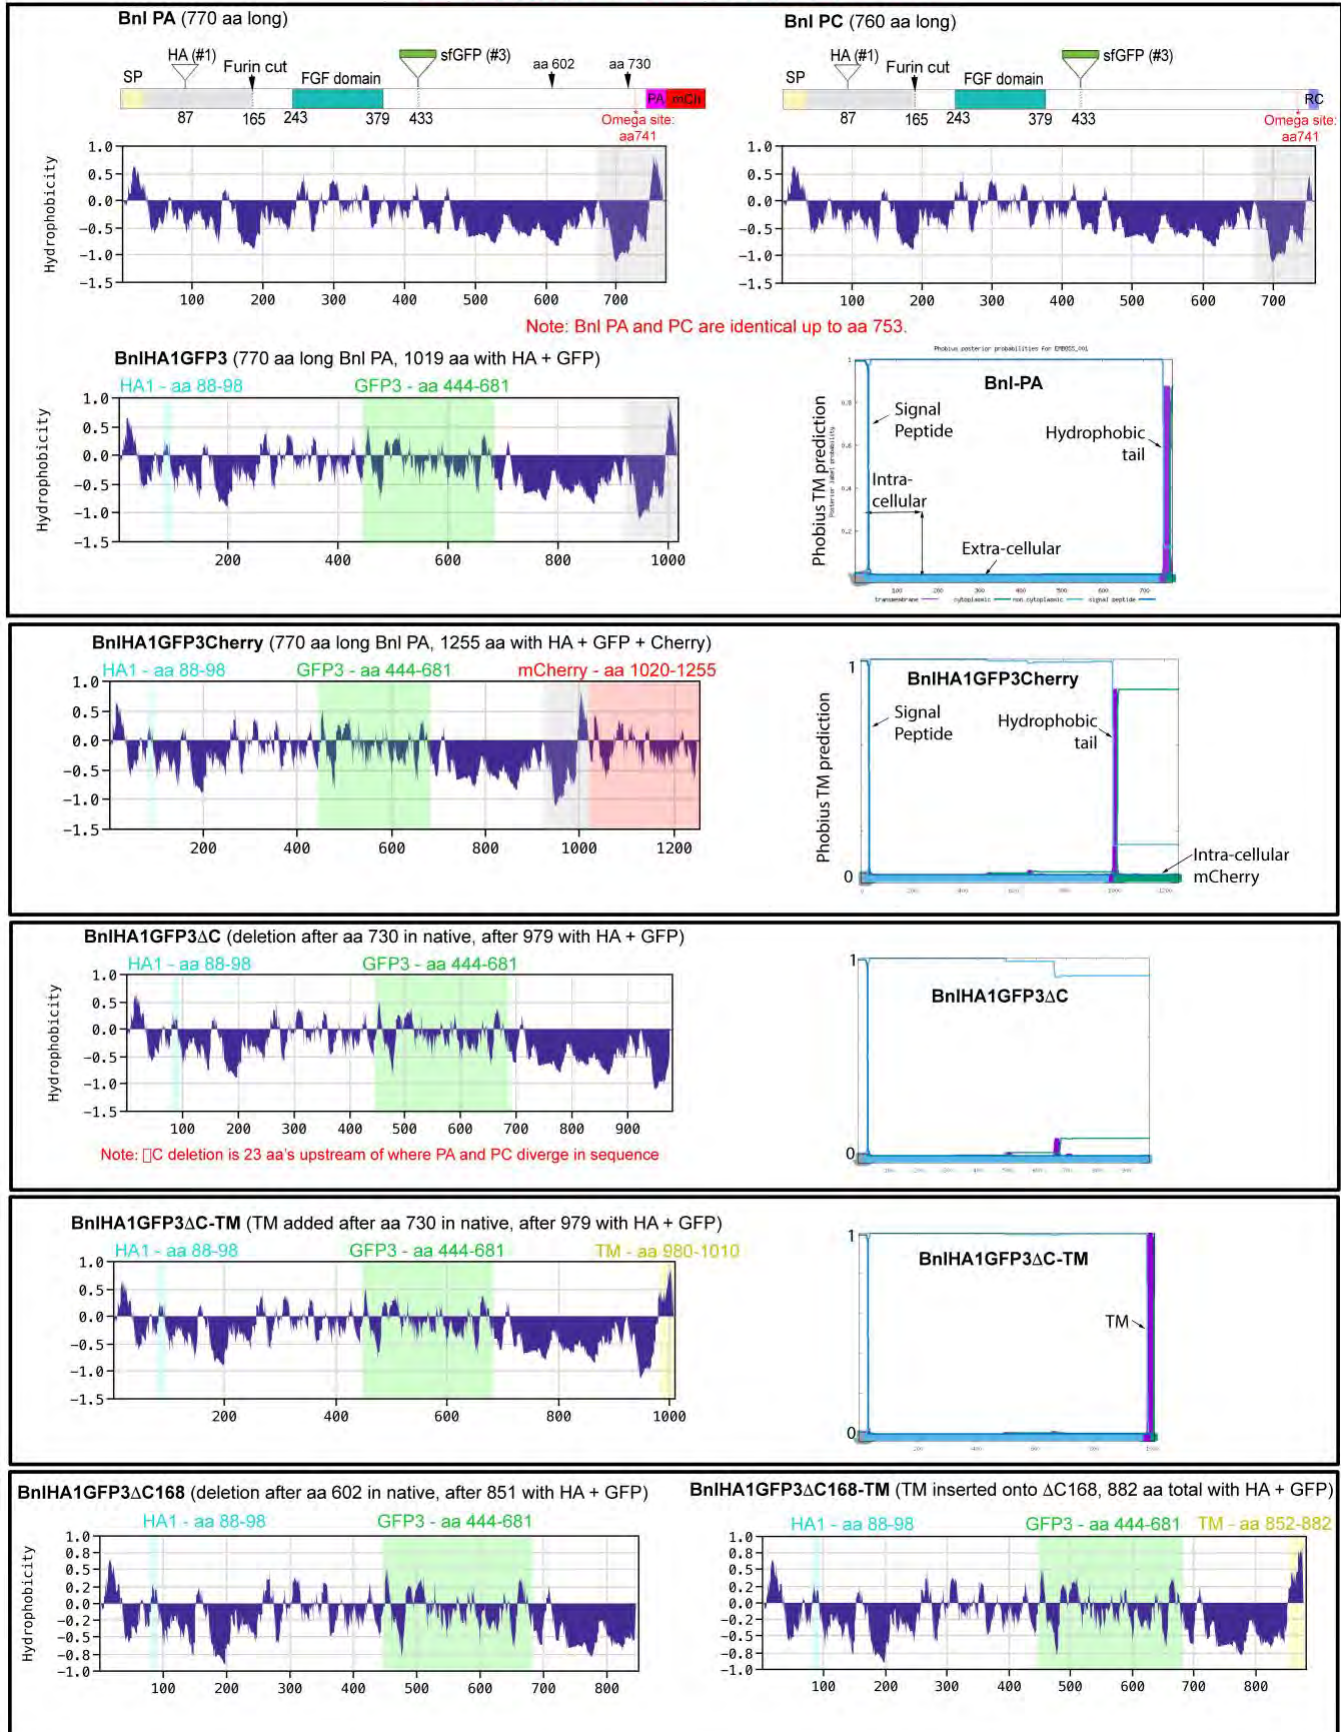



### C. Comparison of *bnl-GAL4*-driven expression levels of transgenic constructs

| Transgenic Constructs                     | Fly line | Chromosomal Insertion | Expression levels * | externalized by source? | ASP uptake? |
|-------------------------------------------|----------|-----------------------|---------------------|-------------------------|-------------|
| UAS-Bnl:GFP $\Delta$ C <sub>40</sub>      | 2_2      | 3                     | +++                 | Yes                     | Yes         |
|                                           | 3_1      | 3                     | ND                  | n/a                     | n/a         |
|                                           | 3_2      | 2                     | ++                  | Yes                     | Yes         |
| UAS-Bnl:GFP $\Delta$ C <sub>40</sub> -TM  | 1_2      | 3                     | +++                 | Yes                     | Yes (R)     |
|                                           | 2_2      | 2                     | +++                 | Yes                     | Yes (R)     |
|                                           | 3_1      | 3                     | ++                  | Yes                     | Yes (R)     |
|                                           | 3_2      | 2                     | ++                  | Yes                     | Yes (R)     |
|                                           | 4_1      | 2                     | ++                  | Yes                     | Yes (R)     |
|                                           | 6_1      | 3                     | ND                  | n/a                     | n/a         |
|                                           | 7_1      | 3                     | +                   | Yes                     | Yes (R)     |
|                                           | 9_2      | 3                     | +++                 | Yes                     | Yes (R)     |
| UAS-Bnl:GFP $\Delta$ C <sub>168</sub>     | 1_2      | 2                     | ++                  | Yes                     | Yes         |
|                                           | 4_1      | 3                     | +++                 | Yes                     | Yes         |
| UAS-Bnl:GFP $\Delta$ C <sub>168</sub> -TM | 1_1      | 3                     | ++                  | Yes                     | Yes (R)     |
|                                           | 2_1      | 3                     | +++                 | Yes                     | Yes (R)     |
| UAS-Bnl:GFP- $\omega^m$                   | 1_1      | 3                     | +++                 | L                       | L           |
|                                           | 4_1      | 2                     | +++                 | L                       | L           |

\* Expression levels were verified by *bnl-Gal4* driven expression of the *UAS* constructs in the wing disc *bnl* source (see Methods). Bnl:GFP lines used in this study was published earlier in Du et al. and Sohr et al.<sup>1,2</sup>. ND: Not detected. Red: Lines with comparable expression levels used in this study. R: Restricted range. L: Very low level.

+++ > ++ > + : High > medium > low levels of expression relative to each other.

### An example of comparison of levels of expression of Bnl:GFP variants under *bnl-Gal4* in the wing disc

|                                                                                                   | Bnl:GFP         | Bnl:GFP $\Delta$ C <sub>40</sub> (2_2) | Bnl:GFP $\Delta$ C <sub>40</sub> -TM (2_2) |
|---------------------------------------------------------------------------------------------------|-----------------|----------------------------------------|--------------------------------------------|
| Mean GFP intensity in the <i>bnl</i> -source (derived from extended Z-stack of 50 $\mu$ m tissue) | 1137.40         | 867.5                                  | 1495.3                                     |
|                                                                                                   | 1142.2          | 1106.3                                 | 899.7                                      |
|                                                                                                   | 1870.1          | 2400.1                                 | 620.6                                      |
|                                                                                                   | 747.7           | 909.8                                  | 1372.5                                     |
| (7 wing discs from 7 animals used)                                                                | 1190.05         | 782.9                                  | 610.1                                      |
|                                                                                                   | 972.8           | 985.5                                  | 1868.6                                     |
|                                                                                                   | 527.6           | 484.3                                  | 1126.298                                   |
| <b>Average</b>                                                                                    | <b>1083.98*</b> | <b>1076.63*</b>                        | <b>1141.87*</b>                            |

\*, Comparable levels of expression of different constructs used in this study.

## D. Examples of gating strategy for FACS analyses

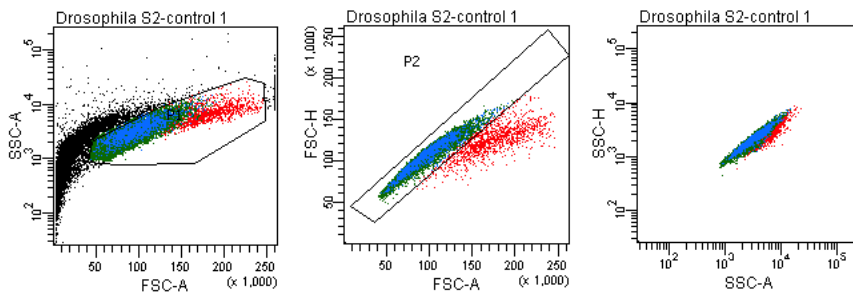

## Supplementary References

1. Du, L., Sohr, A., Yan, G. & Roy, S. Feedback regulation of cytoneme-mediated transport shapes a tissue-specific FGF morphogen gradient. (2018).
2. Sohr, A., Du, L., Wang, R., Lin, L. & Roy, S. Drosophila FGF cleavage is required for efficient intracellular sorting and intercellular dispersal. *J Cell Biol* 218, 1653–1669 (2019).
3. Roy, S., Huang, H., Liu, S. & Kornberg, T. B. Cytoneme-mediated contact-dependent transport of the Drosophila decapentaplegic signaling protein. *Science (New York, N.Y.)* 343, 1244624 (2014).
4. Reichman-Fried, M. & Shilo, B.-Z. Breathless, a Drosophila FGF receptor homolog, is required for the onset of tracheal cell migration and tracheole formation. *Mech Develop* 52, 265–273 (1995).
5. Sato, M. & Kornberg, T. B. FGF Is an Essential Mitogen and Chemoattractant for the Air Sacs of the Drosophila Tracheal System. *Dev Cell* 3, 195–207 (2002).
6. Cabernard, C. & Affolter, M. Distinct Roles for Two Receptor Tyrosine Kinases in Epithelial Branching Morphogenesis in Drosophila. *Dev Cell* 9, 831–842 (2005).
7. Greco, V., Hannus, M. & Eaton, S. Argosomes: a potential vehicle for the spread of morphogens through epithelia. *Cell* 106, 633–645 (2001).
8. Miura, G. I. *et al.* Palmitoylation of the EGFR ligand Spitz by Rasp increases Spitz activity by restricting its diffusion. *Developmental Cell* 10, 167–176 (2006).
9. Greco, V., Hannus, M. & Eaton, S. Argosomes: a potential vehicle for the spread of morphogens through epithelia. *Cell* 106, 633–645 (2001).

## R plot code

```
library(ggplot2)

filename="Control Source"

file_t= "data\\"
file<-paste(file_t,filename, ".csv", sep="")

#data<-read.csv("FinalData\\Control Source.csv", head=TRUE, sep=",")
data<-read.csv(file, head=TRUE, sep=",")

cols<-c("#619cff", "#f8766d", "#00ba38")
#cols<-c("red", "blue", "green")

p<-ggplot(data, aes(x=data$Range, y=data$Counts, fill=data$Length)) +
  #theme_bw()+
  #theme_minimal() +
  geom_bar(width = 30, colour="black", stat="identity") +
  #geom_hline(yintercept = 2.5) +
  #geom_vline(xintercept = c(0,90,180,270)) +
  scale_fill_manual(values = cols) +
  #scale_y_discrete(drop = FALSE) +
  theme(legend.box.just = "top", legend.position = "bottom") +
  theme(panel.grid.major = element_line(colour = "gray"),
        panel.grid.minor = element_line(colour = "blue"),
        panel.background = element_blank(),
        axis.line = element_line(colour = "black"))+
  labs(title = filename,
        fill = "Length range(um)",
        y = "Cytoneme number", limits = c(0, 100), colour =
"Cylinders") +
  coord_polar(theta = "x", start=pi/2, direction=-1) +
  scale_x_discrete("", limits = c(0,90,180,270), labels =
c(0,90,180,270)) +
  scale_y_continuous(limits=c(0,5), breaks= c(1:5))
```

p
